# Supplementary material for: New charge transfer-based organic room temperature phosphorescent trace doping systems
Source: Royal Society of Chemistry journal article supplement (doi:10.1039/d3cc02386a), 2023-01-01
Supplement: d3cc02386a1.pdf [file d3cc02386a1.pdf]

Electronic Supplementary Material (ESI) for Chemical Communications.  
This journal is © The Royal Society of Chemistry 2023

## ***Supplementary Information***

# **New Charge Transfer-based High-Efficiency Organic Room Temperature Phosphorescent Trace Doping Systems**

Yu-Qiang Zhao,<sup>a†</sup> Liping Zhu,<sup>a†</sup> Jian-Mei Lu<sup>a</sup> Le Yu,<sup>a</sup> Lanyun Zhang,<sup>a</sup> and Ying Zhou,<sup>\*a</sup>

<sup>a</sup> College of Chemical Science and Technology, Yunnan University, Yunnan Characteristic Plant Extraction Laboratory, Kunming 650091, P. R. China.

\*Email: yingzhou@ynu.edu.cn

† These authors contributed equally.

## **Table of Contents**

|                                                      |    |
|------------------------------------------------------|----|
| Materials and Instruments.....                       | 2  |
| Experimental Procedures.....                         | 2  |
| Computational Methods.....                           | 2  |
| Molecule synthesis .....                             | 3  |
| Purity analysis of compounds performed by HPLC ..... | 5  |
| Standard protocol for doping material .....          | 5  |
| Molecular dynamics.....                              | 6  |
| Spectroscopic Methods .....                          | 6  |
| TD-DFT Calculation For pure host or guests .....     | 7  |
| NMR and HR-MS spectra .....                          | 11 |
| Photophysical Property.....                          | 19 |
| Crystallography .....                                | 25 |
| Cartesian coordinate.....                            | 34 |
| References.....                                      | 43 |

## Materials and Instruments

Unless otherwise noted, all reagents for chemical synthesis were obtained from commercial suppliers and were used without further purification. 2-amino-6-bromobenzothiazole (BT) was purchased as follows Adamas (Shanghai, China). BT has been purified by three rounds of column chromatography and recrystallization. All guest molecules have been purified by three rounds of column chromatography and recrystallization. Flash chromatography was carried out on silica gel (200-300 mesh). <sup>1</sup>H-NMR spectra were recorded using BRUKER DRX 400 or BRUKER DRX 500 spectrometer and <sup>13</sup>C-NMR was recorded using BRUKER DRX 400 or BRUKER DRX 500 spectrometer. Chemical shifts were expressed in ppm and coupling constants (J) in Hz. High resolution mass spectrometry (HR-MS) was recorded with Agilent-1100 HPLC/TOF mass spectrometer (Agilent Technologies, USA). The crystal diffraction data for complex were collected at 293 K using a Bruker ASX D8 VENTURE, and structures were solved by direct methods using the programme SHELXL2014. The thermal analyses were carried out on METTLER-TOLEDO TGA/DSC HT 1600 simultaneous thermal analyzer, under a nitrogen atmosphere, at heating rate of 10 °C min<sup>-1</sup>. The UV-Vis absorption spectrum was collected from the UV-240IPC spectrophotometer by the dual light path method. The fluorescence spectrum of solution is obtained from a F97XP FL spectrophotometer with a 1 cm standard quartz cell. The excitation slits and emission slits are 5 nm and the voltage is 650 V during the test. The fluorescence spectrum of power is obtained from a F-380 spectrophotometer (GANGDONG SCI.&TECH.CO, LTD, Tianjin, China). The excitation slits and emission slits are 5 nm and the voltage is 450 V during the test. The phosphorescence spectrum of power is obtained from a F-380 spectrophotometer (GANGDONG SCI.&TECH.CO, LTD, Tianjin, China). The excitation slits and emission slits are 5 nm and the voltage is 450 V during the test. Phosphorescence emission lifetimes were performed on Horiba FL-3 and analyzed by the use of a program for exponential fits. Fluorescence quantum yields measurements of pure host and guests were performed on Edinburgh FLS1000 fluorescence spectrophotometer. Fluorescence quantum yields and phosphorescence quantum yields of doped system measurements were performed on Edinburg FLS1000.

## Experimental Procedures

### Computational Methods

#### DFT/TD-DFT calculations

Molecular geometry optimization, vibration frequency analysis and single point energy were carried out within the density functional theory (DFT) framework using the Gaussian 09 software.<sup>[1]</sup> Since it is not necessary to use a large basis set for molecular structure optimization and vibration analysis, we use the B3LYP<sup>[2]</sup> functional with dispersion correction (D3),<sup>[3]</sup> which has the most robust performance in structural optimization, and a small basis set (6-31G\*)<sup>[4]</sup> for molecular structure geometric optimization and vibration analysis. All the optimized molecular structures showed no imaginary vibrations in the frequency calculations. We employ time-dependent density functional theory (TD-DFT) for those at excited state calculation and optimization. In order to better reproduce the experimental results, PBE0<sup>[5]</sup> were chosen to perform tests shows the optimal performance (Fig. S3-S8). After comparing the calculation results and time consumption of different functional and basis set, PBE0 (D3) functional and

def2-TZVP [6] basis set are selected for excited state energy calculation of small molecule, and PBE0 (D3) functional and def2-SVP [6] are used for time-consuming molecular cluster excited state calculation. PBE0 functional combined with the linear re-sponse solvent formalism was used for describing S<sub>1</sub> potential energy in acetonitrile. In order to accurately describe the effects of solvents, all implicit solvent model uses an SMD (solvent model density) [7] model that considers both polar and non-polar components. The hole-charge analysis, molecular orbital and Independent Gradient Model (IGM) analysis were calculated using Multiwfn 3.8, [8] and the molecular visualization were performed using Visual Molecular Dynamics (VMD) package.[9]

## Molecule synthesis

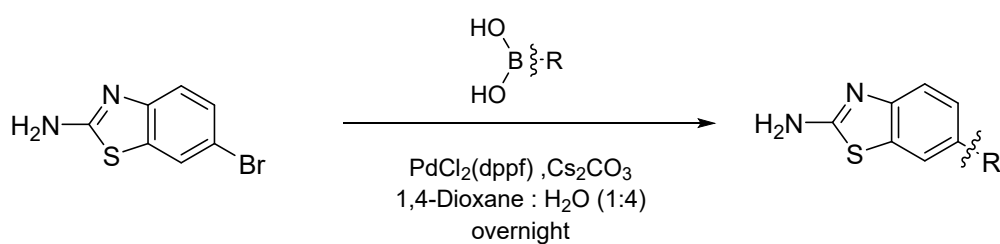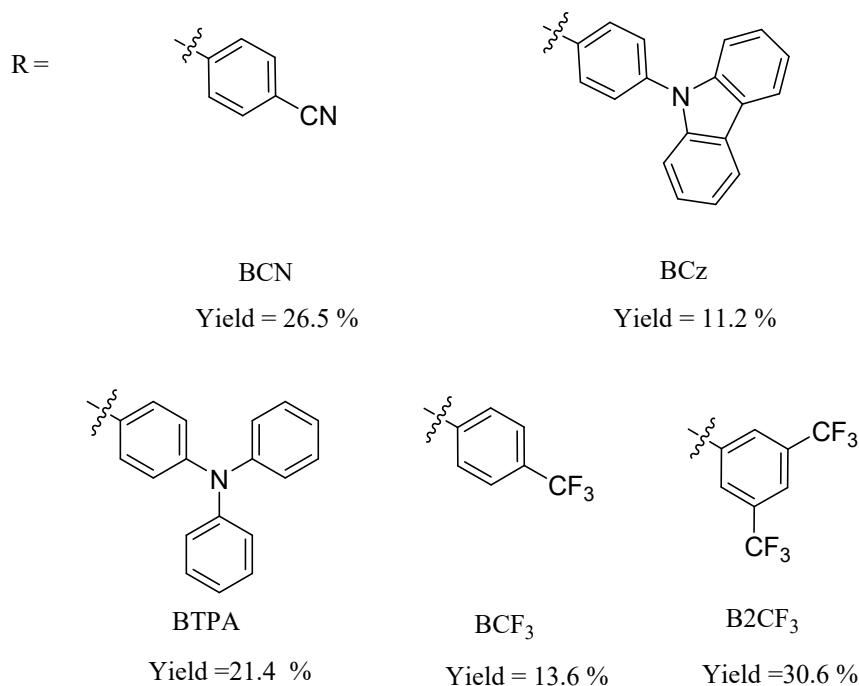

**Scheme S1** Guest molecular synthesis route and structure schematic

The synthesis of **BCN** compound

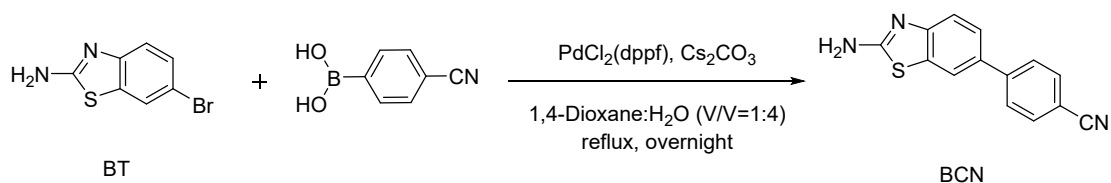

**Scheme S2** BCN synthesis route and structure schematic

The compound BT (753.15 mg, 3 mmol), 4-Cyanophenylboronic acid (481.8 mg, 3.3 mmol), catalyst PdCl<sub>2</sub>(dppf) (90 mg, 0.13 mmol) and Cs<sub>2</sub>CO<sub>3</sub> (1075.1 mg, 3.3 mmol) were added to a 50 mL single-necked flash, and followed by the addition of 12 mL 1,4-dioxane and 3 mL water. Under argon, the reaction mixture was stirred in an oil bath at 96 °C for overnight. After the reaction was completed, the mixture was concentrated under reduce pressure, and then extracted with dichloromethane for 3 times. To combine the extract, dried with anhydrous Na<sub>2</sub>SO<sub>4</sub> and concentrated in vacuo. The crude product was purified on silica column chromatography (PE: EA=5:1) to obtain pale brown solid **BCN** in 26.5% yield

<sup>1</sup>H NMR (500 MHz, DMSO-d<sub>6</sub>) δ 8.12 (d, J = 2.0 Hz, 1H), 7.88 (s, 4H), 7.66 (s, 2H), 7.62 (dd, J = 8.4, 2.0 Hz, 1H), 7.43 (d, J = 8.4 Hz, 1H).

<sup>13</sup>C NMR (125 MHz, DMSO) δ 168.13, 153.98, 145.17, 133.25, 131.24, 127.46, 125.17, 120.03, 118.45, 109.50.

HRMS (ESI) m/z: [M+H]<sup>+</sup> Calcd for C<sub>14</sub>H<sub>10</sub>N<sub>3</sub>S 252.0595; Found 252.0592.

Melting point: 242.7 °C

The synthesis of **BCz** compound

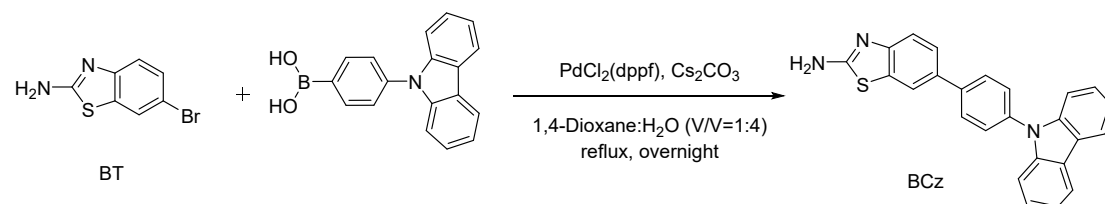

#### Scheme S3 BCz synthesis route and structure schematic

The synthesis method of **BCz** was similar to the **BCN**. White solid was obtained in 11.2 % yield.

<sup>1</sup>H NMR (400 MHz, DMSO-d<sub>6</sub>) δ 8.27 (d, J = 7.7 Hz, 2H), 8.13 (d, J = 1.9 Hz, 1H), 7.96 (d, J = 8.5 Hz, 2H), 7.73 – 7.59 (m, 5H), 7.51 – 7.41 (m, 5H), 7.31 (ddd, J = 8.0, 4.7, 3.4 Hz, 2H).

<sup>13</sup>C NMR (100 MHz, DMSO) δ 167.61, 153.19, 140.61, 139.89, 135.92, 132.55, 128.39, 127.47, 126.73, 124.90, 123.24, 121.00, 120.54, 119.59, 118.49, 110.17.

HRMS (ESI) m/z: [M+Na]<sup>+</sup> Calcd for C<sub>25</sub>H<sub>17</sub>N<sub>3</sub>NaS 414.1041; Found 414.1033.

Melting point: 302.2 °C

The synthesis of **BTPA** compound

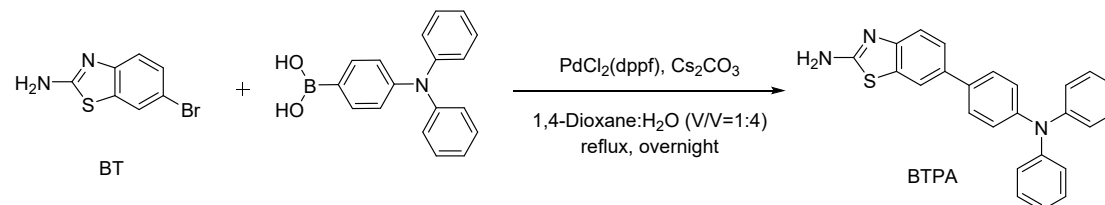

#### Scheme S4 BTPA synthesis route and structure schematic

The synthesis method of **BTPA** was similar to the **BCN**. White solid was obtained in 21.4 % yield.

<sup>1</sup>H NMR (500 MHz, DMSO-d<sub>6</sub>) δ 7.94 (d, J = 1.9 Hz, 1H), 7.59 (d, J = 8.7 Hz, 2H), 7.52 – 7.47 (m, 3H), 7.37 (d, J = 8.4 Hz, 1H), 7.36 – 7.29 (m, 4H), 7.09 – 7.01 (m, 8H).

<sup>13</sup>C NMR (125 MHz, DMSO) δ 167.17, 152.55, 147.62, 146.51, 134.98, 133.04, 132.41, 130.03, 127.79, 124.38, 124.19, 123.74, 123.540, 119.56, 118.92, 118.34.

HRMS (ESI)  $m/z$ :  $[M+H]^+$  Calcd for  $C_{25}H_{20}N_3S$  394.1378; Found 394.1373.

Melting point: 277.8 °C

The synthesis of **BCF<sub>3</sub>** compound

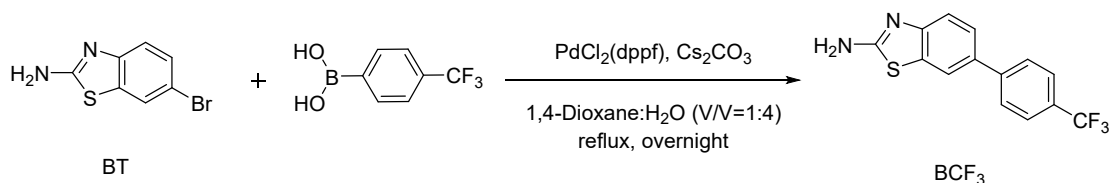

**Scheme S5** BCF<sub>3</sub> synthesis route and structure schematic

The synthesis method of **BCF<sub>3</sub>** was similar to the BCN. White solid was obtained in 13.6 % yield.

<sup>1</sup>H NMR (400 MHz, DMSO-*d*<sub>6</sub>) δ 8.10 (d, *J* = 1.9 Hz, 1H), 7.89 (d, *J* = 8.2 Hz, 2H), 7.78 (d, *J* = 8.2 Hz, 2H), 7.66 (s, 2H), 7.60 (dd, *J* = 8.4, 2.0 Hz, 1H), 7.43 (d, *J* = 8.3 Hz, 1H).

<sup>13</sup>C NMR (100 MHz, DMSO) δ 167.51, 153.40, 144.86, 134.63, 132.79, 132.69, 127.19, 125.67, 125.63, 124.90, 119.44, 118.71.

HRMS (ESI)  $m/z$ :  $[M+H]^+$  Calcd for  $C_{14}H_{10}F_3N_2S$  295.0517; Found 295.0507.

Melting point: 236.9 °C

The synthesis of **B2CF<sub>3</sub>** compound

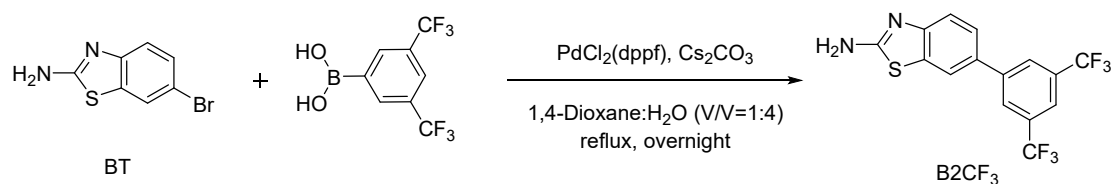

**Scheme S6** B2CF<sub>3</sub> synthesis route and structure schematic

The synthesis method of **B2CF<sub>3</sub>** was similar to the BCN. White solid was obtained in 30.6 % yield.

<sup>1</sup>H NMR (500 MHz, DMSO-*d*<sub>6</sub>) δ 8.33 (s, 2H), 8.26 (d, *J* = 2.0 Hz, 1H), 8.00 (s, 1H), 7.73 (dd, *J* = 8.4, 2.0 Hz, 1H), 7.68 (s, 2H), 7.44 (d, *J* = 8.4 Hz, 1H).

<sup>13</sup>C NMR (125 MHz, DMSO) δ 167.84, 153.88, 143.54, 134.19, 132.96, 131.87, 131.54, 130.86, 126.98, 125.02, 119.80, 118.77.

HRMS (ESI)  $m/z$ :  $[M+H]^+$  Calcd for  $C_{15}H_9F_6N_2S$  363.0391; Found 363.0386.

Melting point: 209.0 °C

## Purity analysis of compounds performed by HPLC

HPLC analysis of host and guest was performed using the Reversedphase (RP)-HPLC (Agilent Technologies 1200 Series) following chromatographic conditions: Agilent Eclipse XDB C18 column (5 μm, 150 × 4.60 mm) eluted at 1 mL/min with a gradient of methanol (MeOH):H<sub>2</sub>O, starting at 30% MeOH for 1 min, increased uniformly to 100% MeOH over 30 min and maintained at 100% MeOH for 5 min. This was uniformly reduced to 30% MeOH during the last 5 min. column temperature: 20°C, The samples were detected with the help of a UV detector at 254 nm.

## Standard protocol for doping material

The doped materials were prepared using the solvent evaporation method. To begin, 10 mL of ethyl acetate was used to dissolve the appropriate amount of the guest material. The guest reserve that was produced has a concentration of 10 mM. Accurately weigh 100 mg **BT** and completely dissolve it in ethyl acetate. The corresponding guest stock solution was added to the **BT** solution according to the molar ratio calculation. After mixing the two solutions, the solvent was distilled under reduced pressure with an oil pump to obtain the resulting mixture.

## Molecular dynamics

All molecular dynamics (MD) simulations were performed using the GROMACS 2019.6 suite of programs.<sup>[10]</sup> The force field parameters of **BT** and **BCN** were built from the general amber force field (GAFF).<sup>[11]</sup> The restrained electrostatic potential (RESP) of **BT** and **BCN** was calculated by Multiwfn 3.8<sup>[8]</sup> based on the optimized geometry at B3LYP/6-31+G\* level. The top file of small molecule is generated by Sobtop software.<sup>[12]</sup> All simulations are performed under periodic boundary conditions. First, we perform an energy minimum on the system until the maximum force < 100.0 kJ/mol/nm. Then 100 ps NVT simulation was performed under conditions that constraint small molecules (harmonic restraint of 1,000.0 kJ/mol/nm). An annealing simulation (298-373-298 K / 0 ns-2.5 ns-5 ns) was run all 100 ns followed under the NPT ensemble. Finally, we performed 1000 ns MD simulation under NPT ensemble removing constraints. The temperature is coupled by a Velocity rescaling (V-rescale) thermostat.<sup>[13]</sup> The pressure in the pre-equilibrium and annealing simulation stages is coupled by a Berendsen barostat.<sup>[14]</sup> The pressure in the formal simulation is coupled by a more accurate Parrinello-Rahman barostat.<sup>[15]</sup> The coupling times of temperature and pressure were 0.1 ps and 1.0 ps, respectively. The fast smooth particle-mesh ewald (SPME) electrostatics is used to calculate the long-distance electrostatic interactions. The short-range neighborlist cutoff and electrostatic cutoff value is 1.4 nm. The short-range van der Waals interaction is calculated at 1.4 nm. Bond parameters are holonomic constrained by LINCS constraint-algorithm, and the time step of integration is 2 fs.

## Spectroscopic Methods

Accurately weigh a certain amount of **BT**, **BCN**, **BCz**, **BTPA**, **BCF<sub>3</sub>**, and **B2CF<sub>3</sub>** then dissolved in a certain volume of ethyl acetate to prepare a probe stock solution with a concentration of 10.0 mM to prepare for the subsequent experiments. When preparing for the test, take 3.0  $\mu$ L of the stock solution and dilute it into the 3.0 mL acetonitrile to prepare a final concentration of 10.0  $\mu$ M test solution. Then, an appropriate amounts of test solution was transferred to a standard quartz cuvette of 1.0 cm  $\times$  1.0 cm to collect UV-visible absorption and fluorescence emission spectra. In addition, the absorption and emission spectra in Fig. S28 were normalized. The solid state emission tests were performed by uniformly distributing the compound powder between two circular quartz plates ( $\phi$ =2 cm) and then fixing them on the spectrometer test clips.

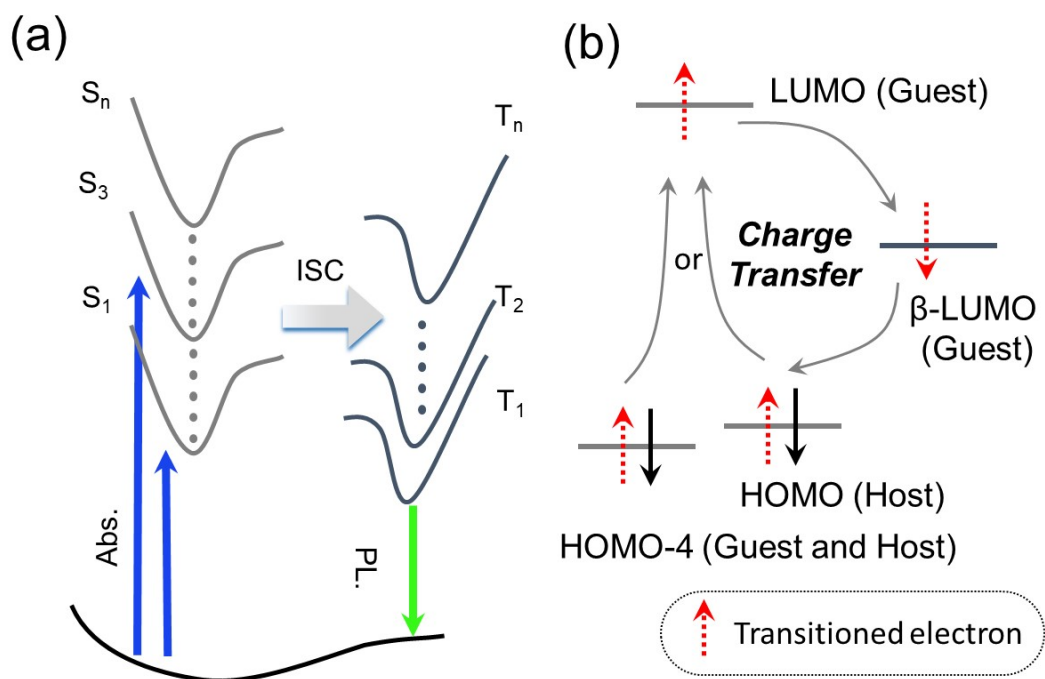

**Scheme S7** (a) The Jablonski Diagram of **BCN/BT** molecular cluster absorbance (Abs.) and phosphorescence (PL.). (b) Probable paths of charge transfer between host and guest in **BCN/BT** molecular cluster.

### TD-DFT Calculation For pure host or guests

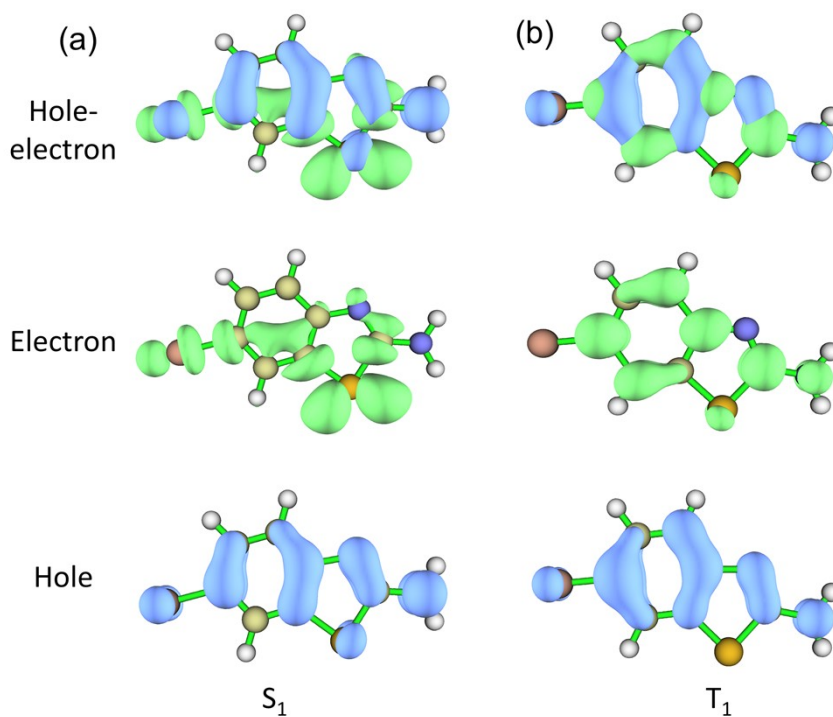

**Fig. S1** Schematic diagram of the hole charge distribution in the principal least-excited singlet ( $S_1$ ) and triplet states ( $T_1$ ).

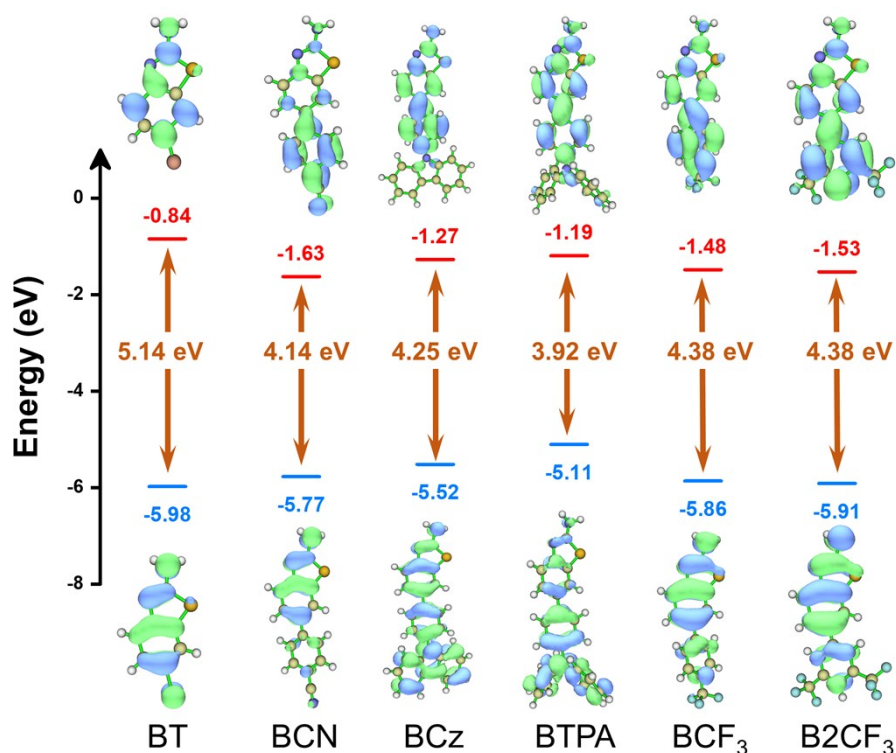

**Fig. S2** Schematic diagram of frontier molecular orbital energy and electron density distribution of host and guests.

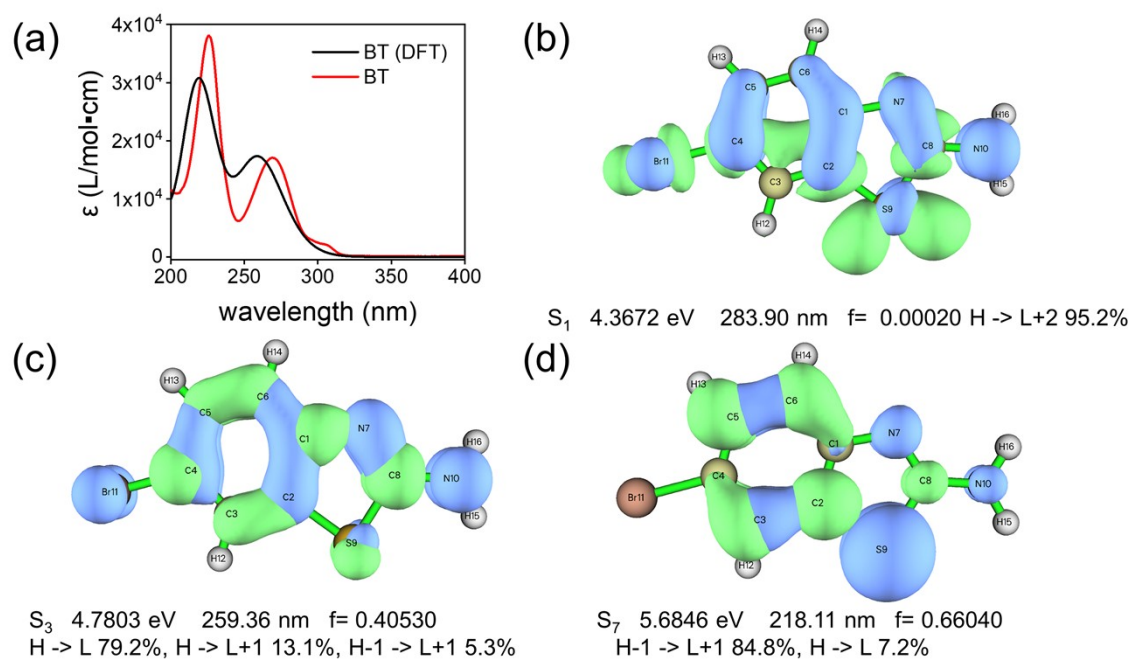

**Fig. S3** Uv-vis spectra of **BT**, red solid line represents measured (10  $\mu$ M) in acetonitrile, blank solid line represents obtained with DFT calculation use PBE0/def2-TZVP with acetonitrile (SMD). (b) Visualize the hole electron distribution of  $S_1$  for **BT**. (c) Visualize the hole electron distribution of  $S_3$  for **BT**. (d) Visualize the hole electron distribution of  $S_7$  for **BT**. Blue and green isosurfaces represent hole and electron distributions, respectively.



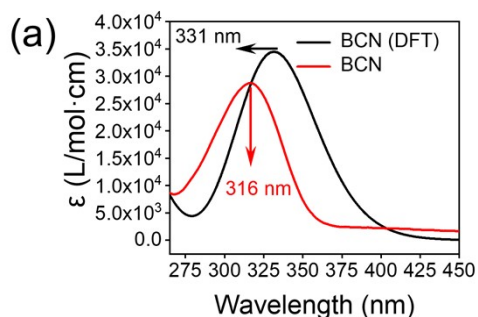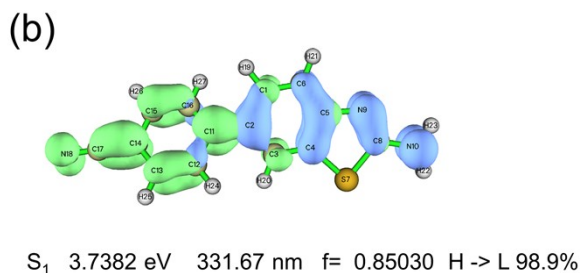

**Fig. S4** (a) Uv-vis spectra of **BCN**, red solid line represents measured (10  $\mu\text{M}$ ) in acetonitrile, blank solid line represents obtained with DFT calculation use PBE0/def2-TZVP with acetonitrile (SMD). (b) Visualize the hole electron distribution of  $S_1$  for **BCN**. Bule and green isosurfaces represent hole and electron distributions, respectively.

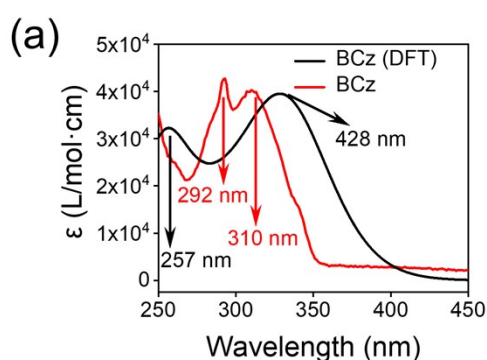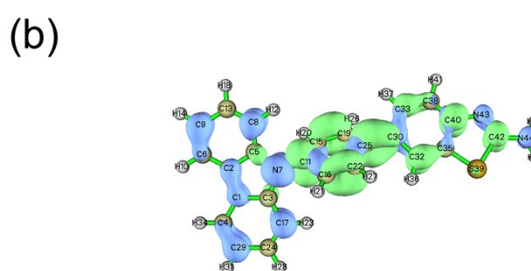

**Fig. S5** (a) Uv-vis spectra of **BCz**, red solid line represents measured (10  $\mu\text{M}$ ) in acetonitrile, blank solid line represents obtained with DFT calculation use PBE0/def2-TZVP with acetonitrile (SMD). (b) Visualize the hole electron distribution of  $S_1$  for **BCz**. Bule and green isosurfaces represent hole and electron distributions, respectively.

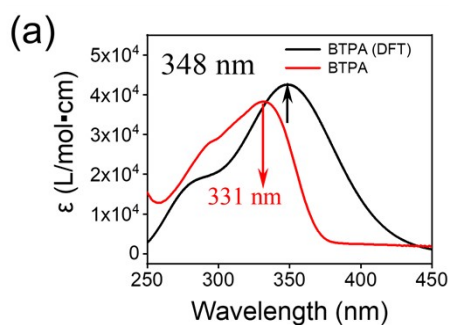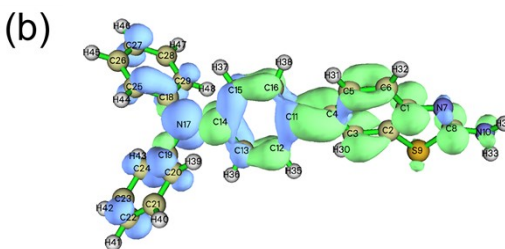

**Fig. S6** (a) Uv-vis spectra of **BTPA**, red solid line represents measured (10  $\mu\text{M}$ ) in acetonitrile, blank solid line represents obtained with DFT calculation use PBE0/def2-TZVP with acetonitrile (SMD). (b) Visualize the hole electron distribution of  $S_1$  for **BTPA**. Bule and green isosurfaces represent hole and electron distributions, respectively.

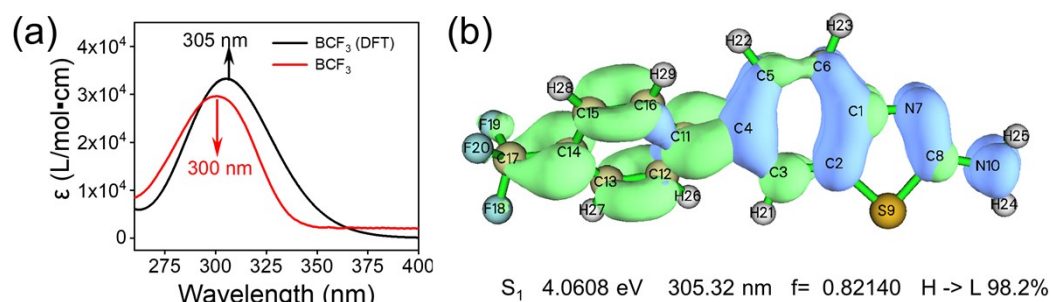

**Fig. S7** (a) Uv-vis spectra of **BCF<sub>3</sub>**, red solid line represents measured (10 μM) in acetonitrile, blank solid line represents obtained with DFT calculation use PBE0/def2-TZVP with acetonitrile (SMD). (b) Visualize the hole electron distribution of  $S_1$  for **BCF<sub>3</sub>**. Blue and green isosurfaces represent hole and electron distributions, respectively.

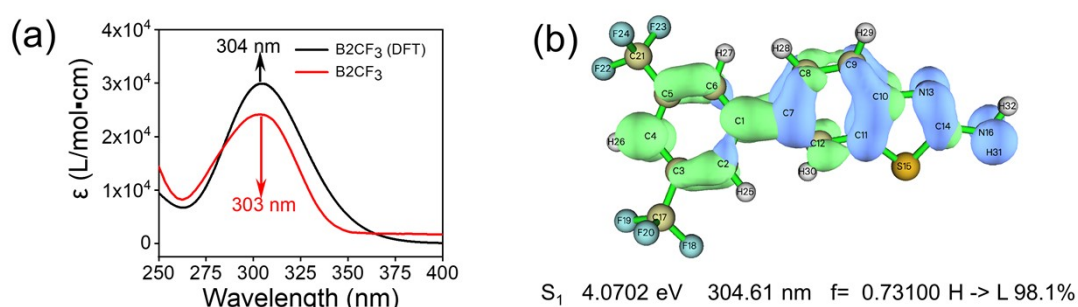

**Fig. S8** (a) Uv-vis spectra of **B2CF<sub>3</sub>**, red solid line represents measured (10 μM) in acetonitrile, blank solid line represents obtained with DFT calculation use PBE0/def2-TZVP with acetonitrile (SMD). (b) Visualize the hole electron distribution of  $S_1$  for **B2CF<sub>3</sub>**. Blue and green isosurfaces represent hole and electron distributions, respectively.

**Table S1** Lowest singly excited state ( $S_1$ ) properties of compounds

| Compound                | Energy (eV) | $D_{ict}$ (Å) | Strength oscillator ( $f$ ) | Contribution   |
|-------------------------|-------------|---------------|-----------------------------|----------------|
| <b>BT</b>               | 4.367       | 1.273         | 0.0002                      | H -> L+2 95.2% |
| <b>BCN</b>              | 3.215       | 4.224         | 0.0395                      | H -> L 98.9%   |
| <b>BCz</b>              | 3.717       | 2.880         | 0.8551                      | H -> L 96.9%   |
| <b>BTPA</b>             | 3.505       | 3.371         | 0.9356                      | H -> L 96.3%   |
| <b>BCF<sub>3</sub></b>  | 4.061       | 2.816         | 0.8214                      | H -> L 98.2%   |
| <b>B2CF<sub>3</sub></b> | 4.070       | 2.938         | 0.7310                      | H -> L 98.1%   |

H: HOMO, highest occupied molecular orbital; L: LUMO, lowest unoccupied molecular orbital

## NMR and HR-MS spectra

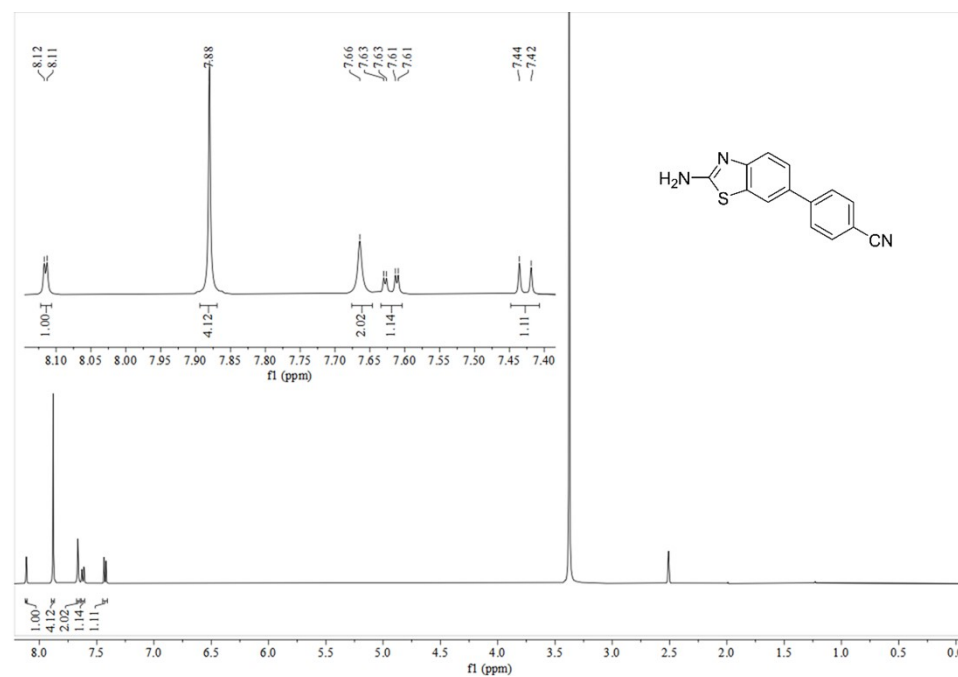

Fig. S9 <sup>1</sup>H-NMR of BCN (400 Hz, DMSO-*d*<sub>6</sub>)

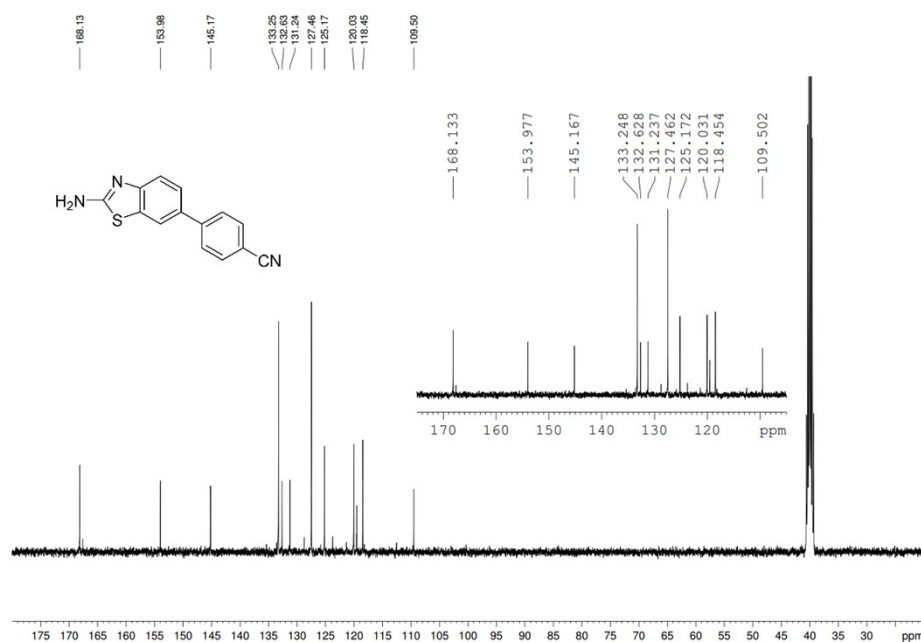

Fig. S10 <sup>13</sup>C-NMR of BCN (100 Hz, DMSO-*d*<sub>6</sub>)

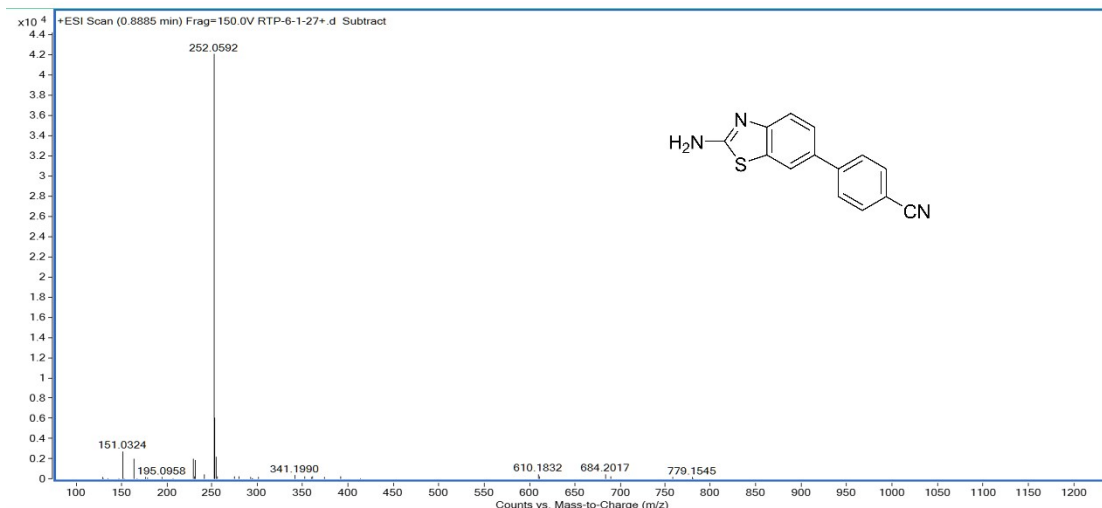

Fig. S11 HR-MS (ESI) of BCN

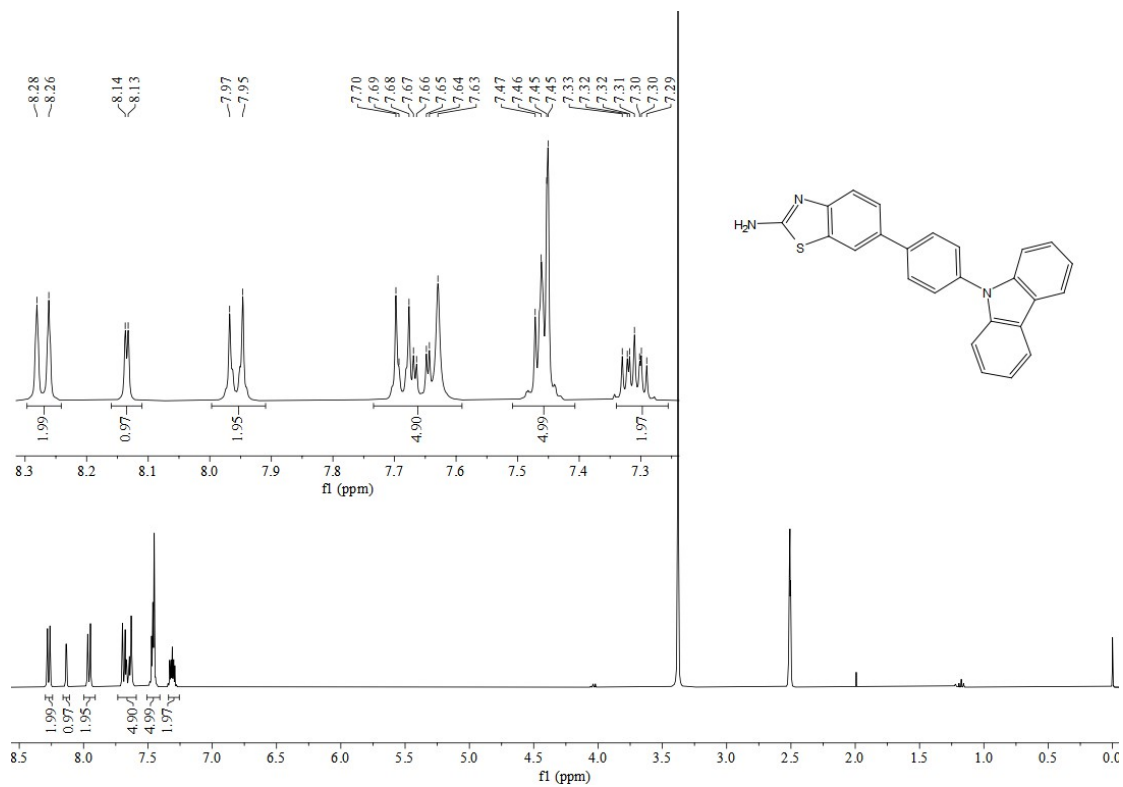

Fig. S12 <sup>1</sup>H-NMR of BCz (400 Hz, DMSO-d<sub>6</sub>)

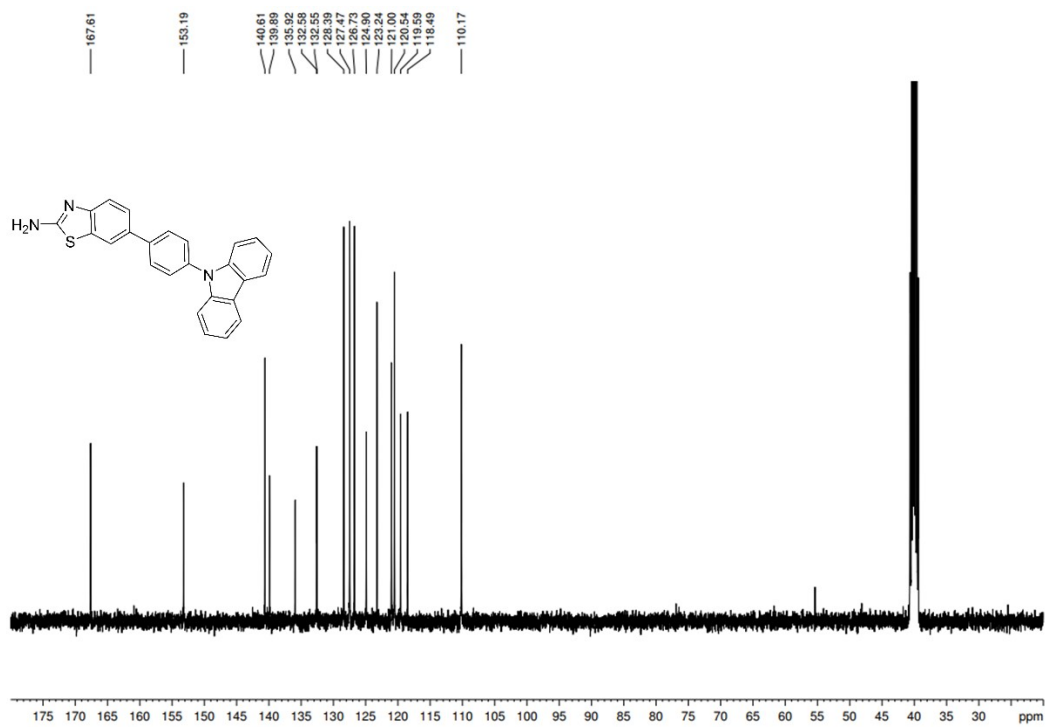

Fig. S13  $^{13}\text{C}$ -NMR of BCz (100 Hz,  $\text{DMSO-}d_6$ )

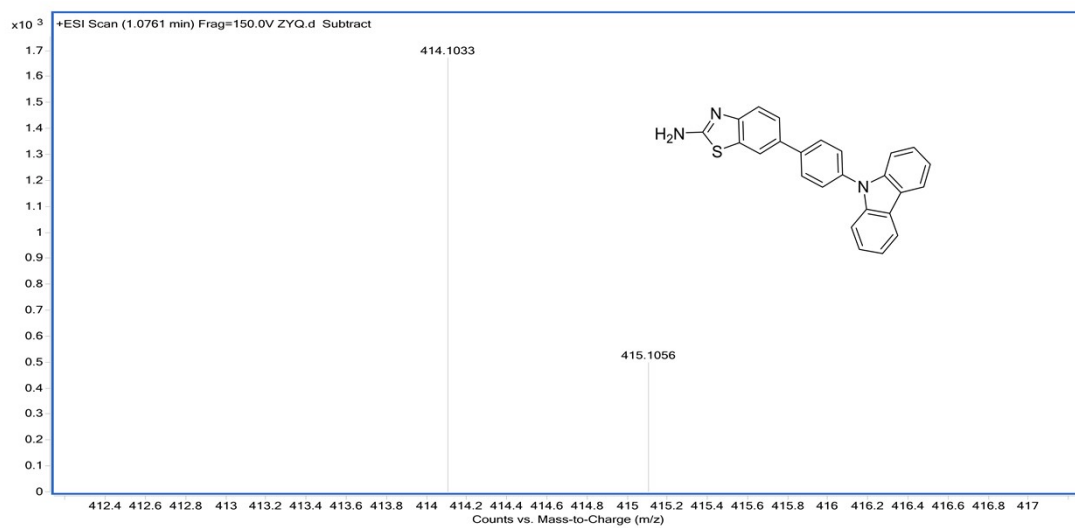

Fig. S14 HR-MS (ESI) of BCz

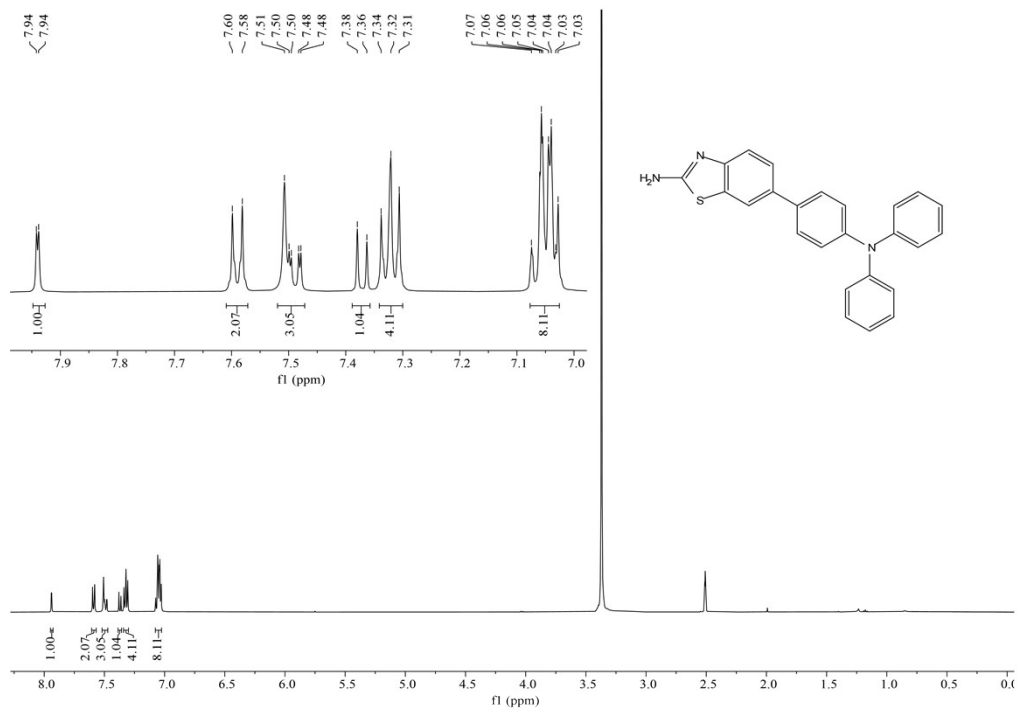

Fig. S15 <sup>1</sup>H-NMR of BTPA (400 Hz, DMSO-*d*<sub>6</sub>)

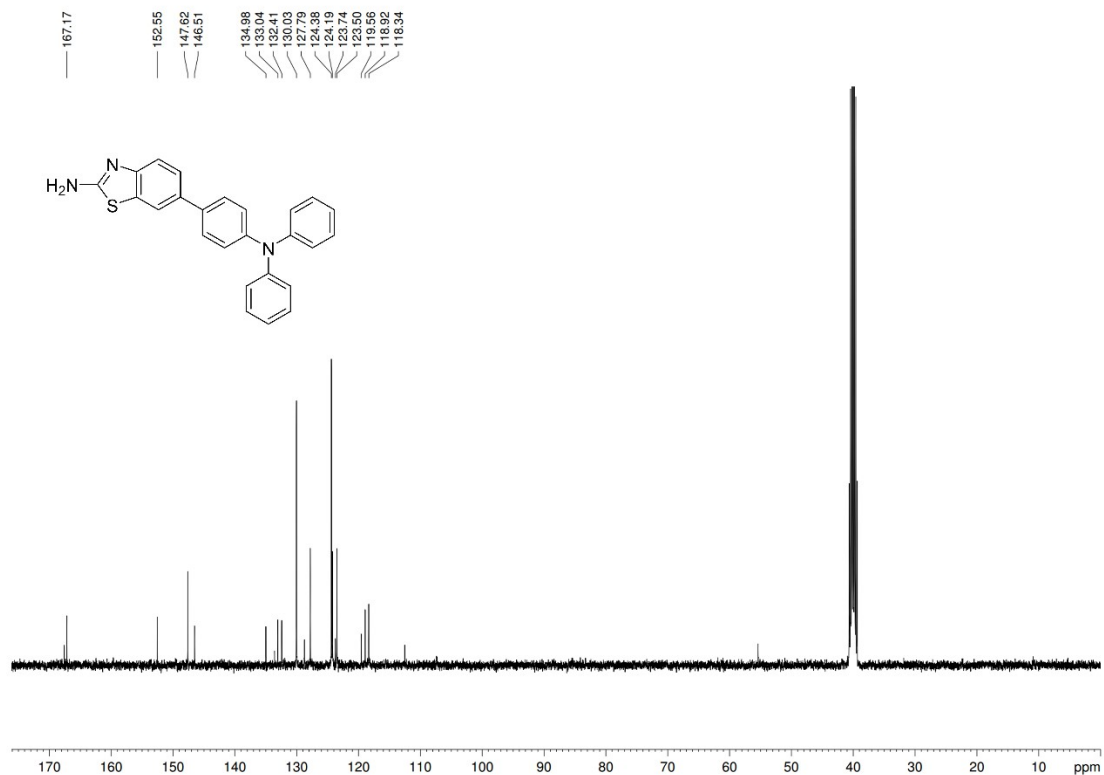

Fig. S16 <sup>13</sup>C-NMR of BTPA (100 Hz, DMSO-*d*<sub>6</sub>)

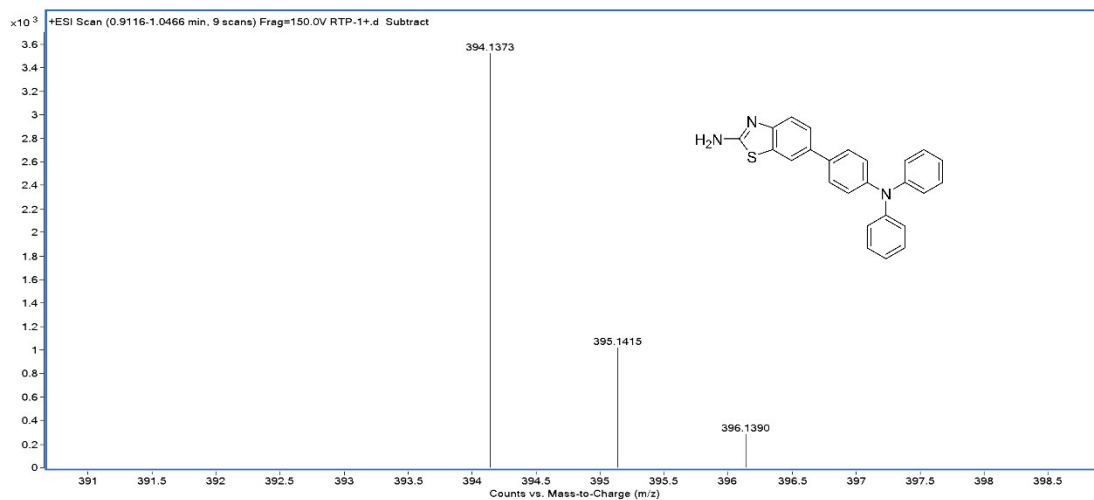

Fig. S17 HR-MS (ESI) of BTPA

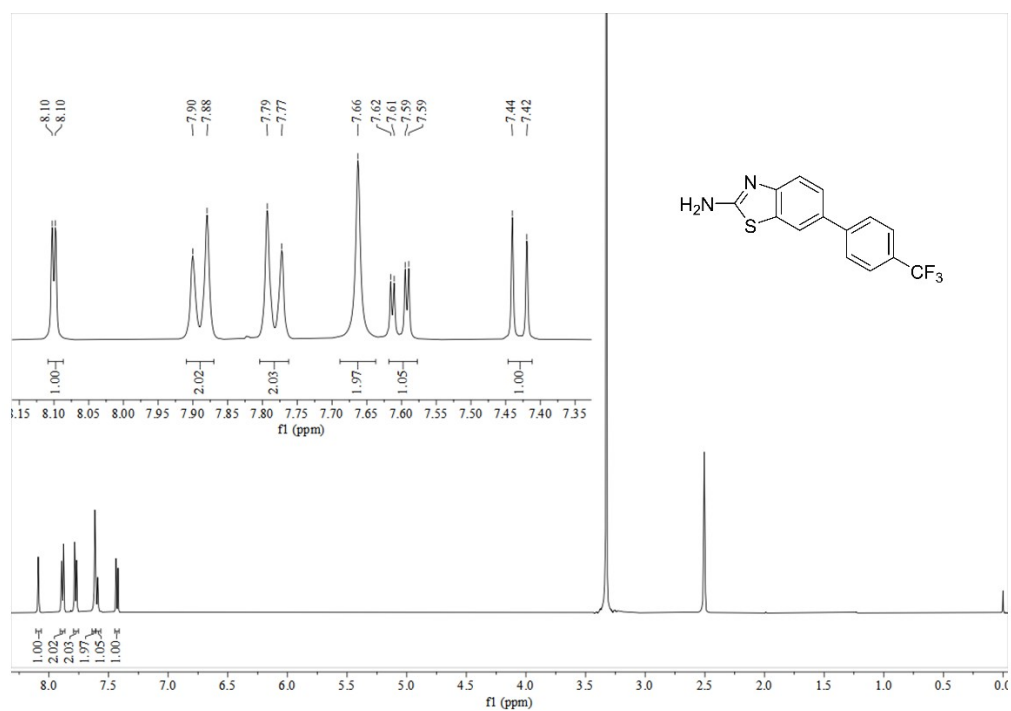

Fig. S18 <sup>1</sup>H-NMR of BCF<sub>3</sub> (400 Hz, DMSO-*d*<sub>6</sub>)

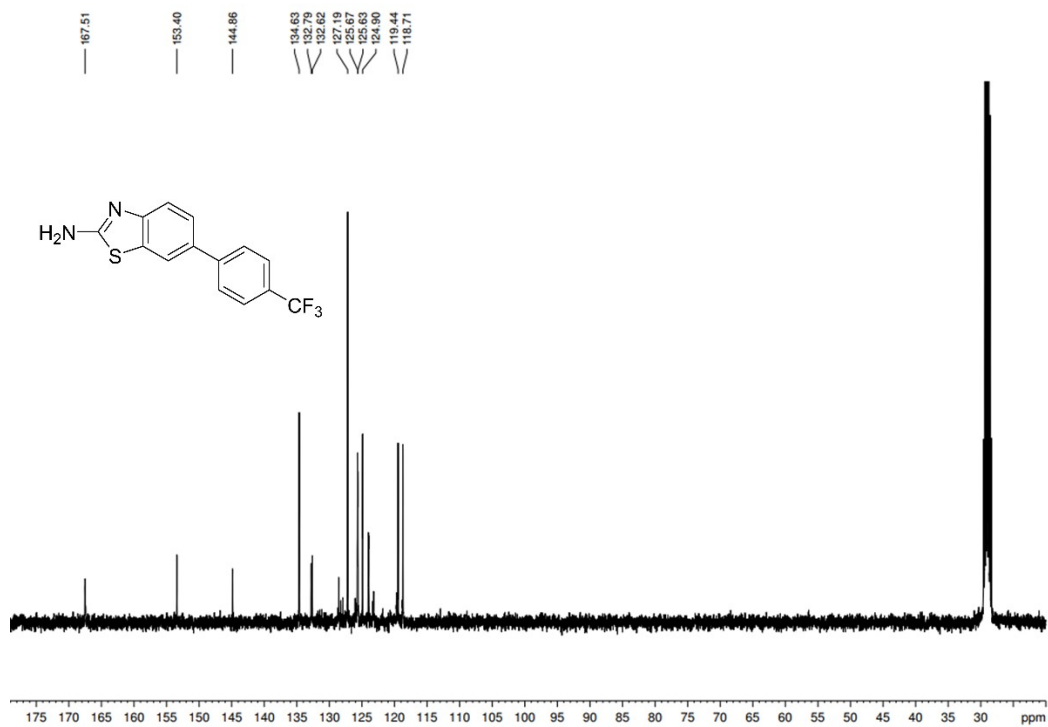

Fig. S19 <sup>13</sup>C-NMR of BCF<sub>3</sub> (100 Hz, DMSO-*d*<sub>6</sub>)

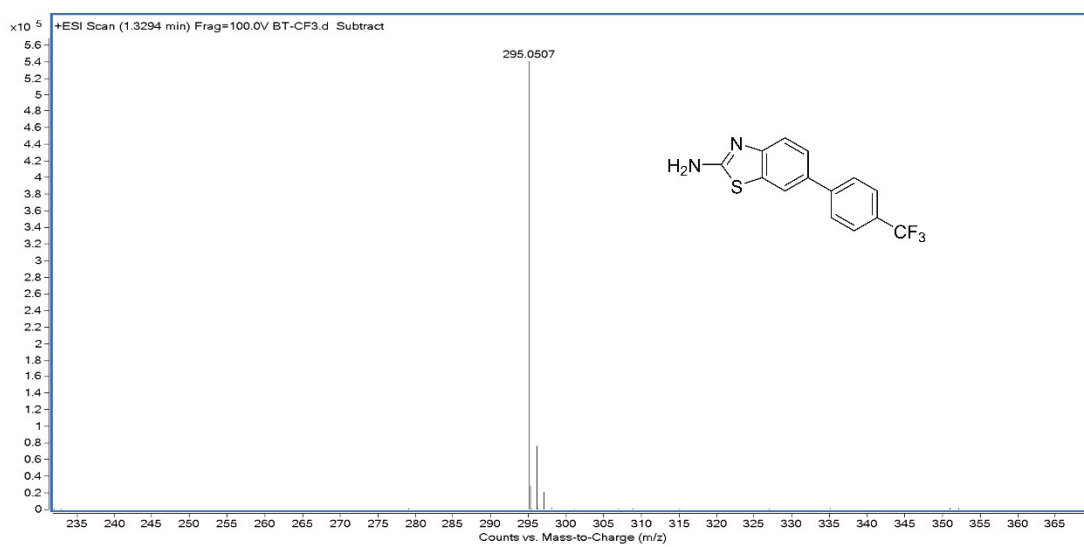

Fig. S20 HR-MS (ESI) of BCF<sub>3</sub>



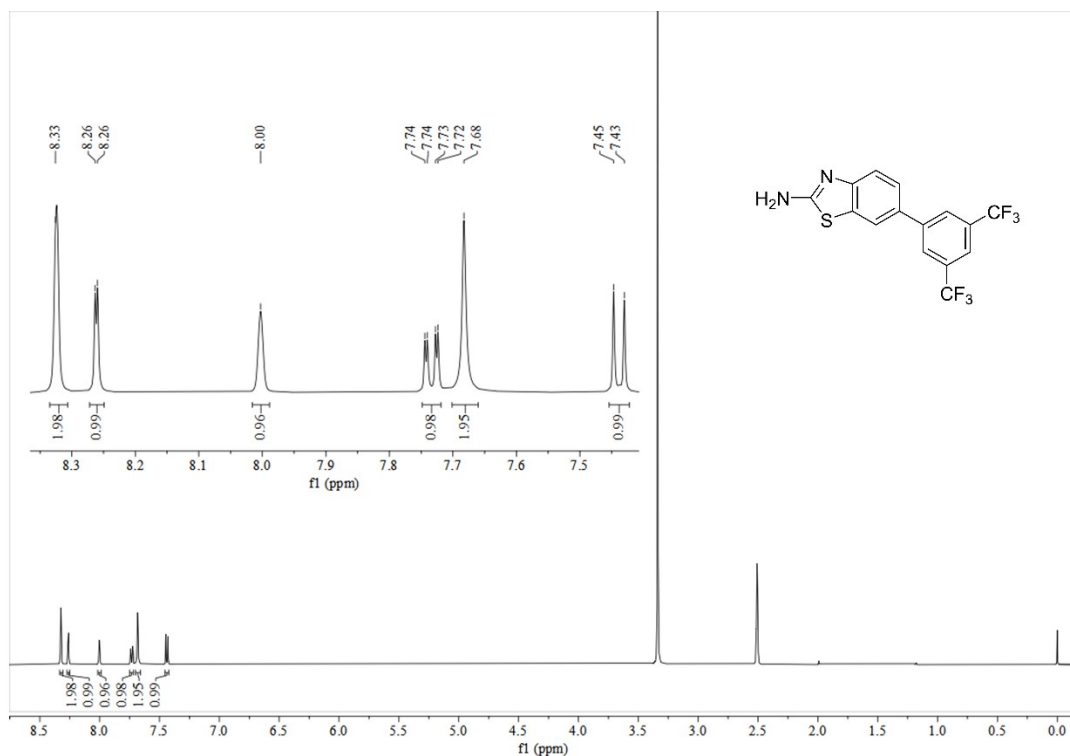

Fig. S21 <sup>1</sup>H-NMR of **B2CF<sub>3</sub>** (400 Hz, DMSO-*d*<sub>6</sub>)

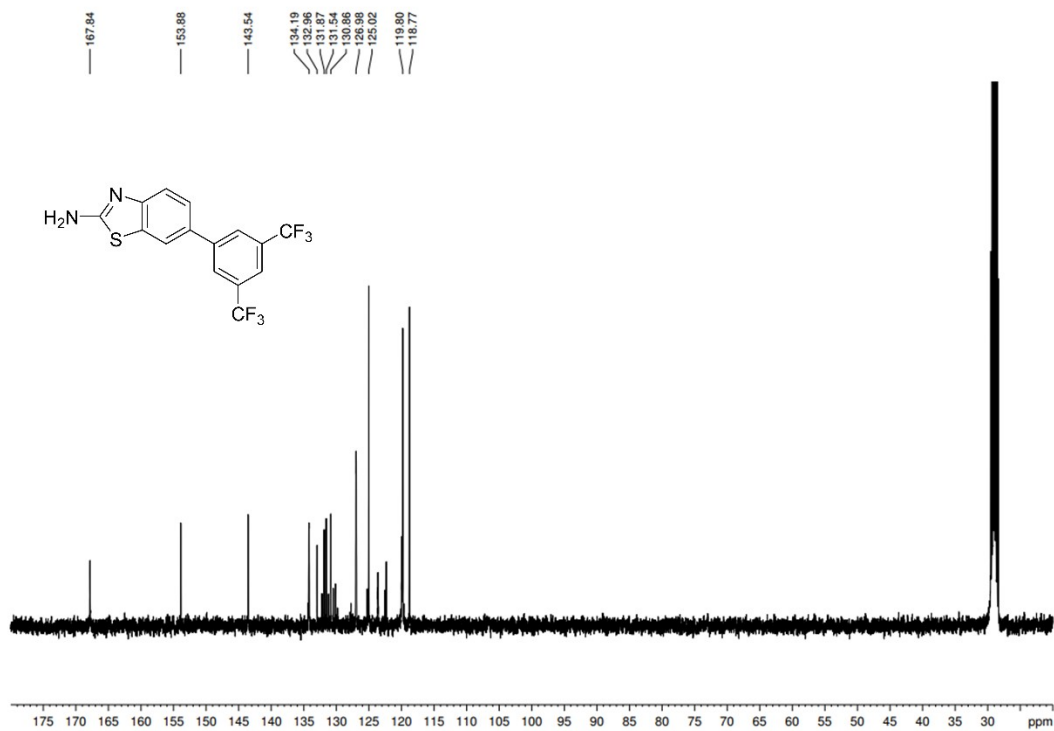

Fig. S22 <sup>13</sup>C-NMR of **B2CF<sub>3</sub>** (100 Hz, DMSO-*d*<sub>6</sub>)

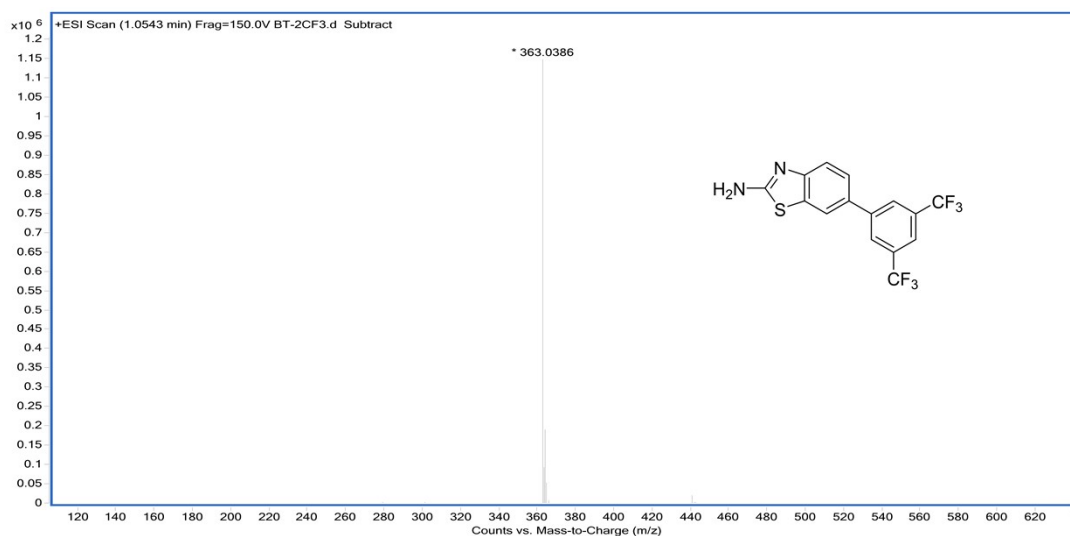

Fig. S23 HR-MS (ESI) of B2CF<sub>3</sub>

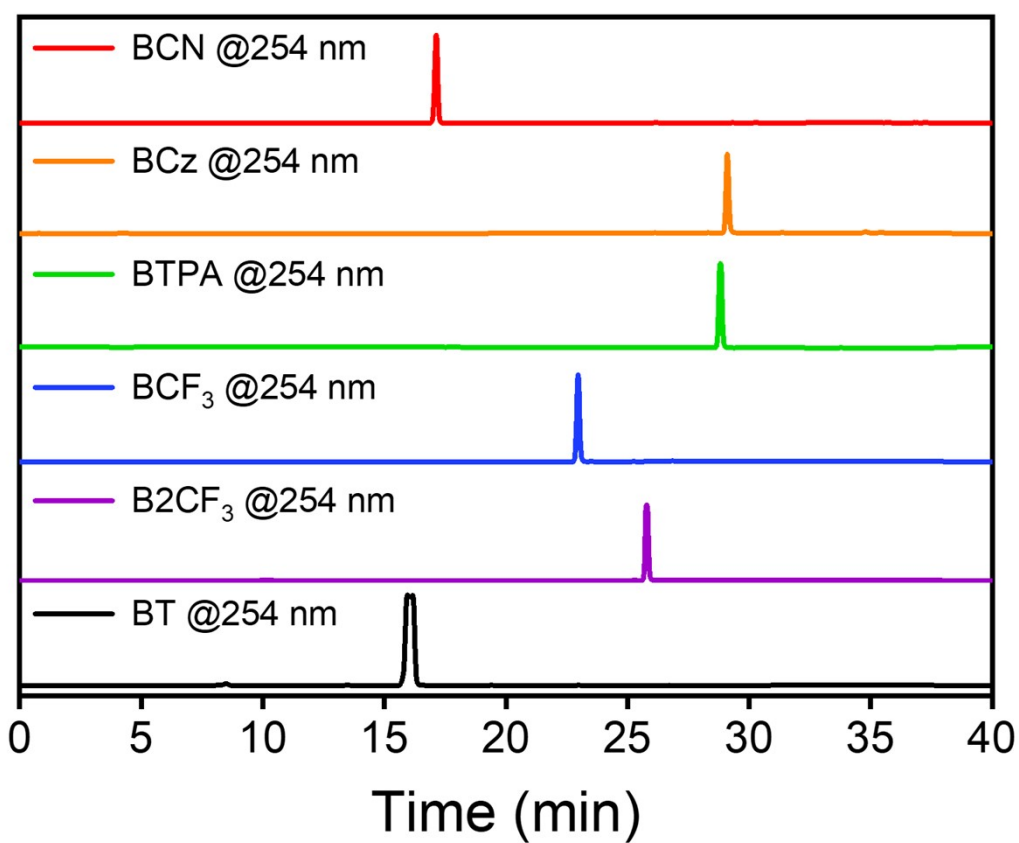

Fig. S24 HPLC purity assessment of the host and synthesized guests.

## Photophysical Property

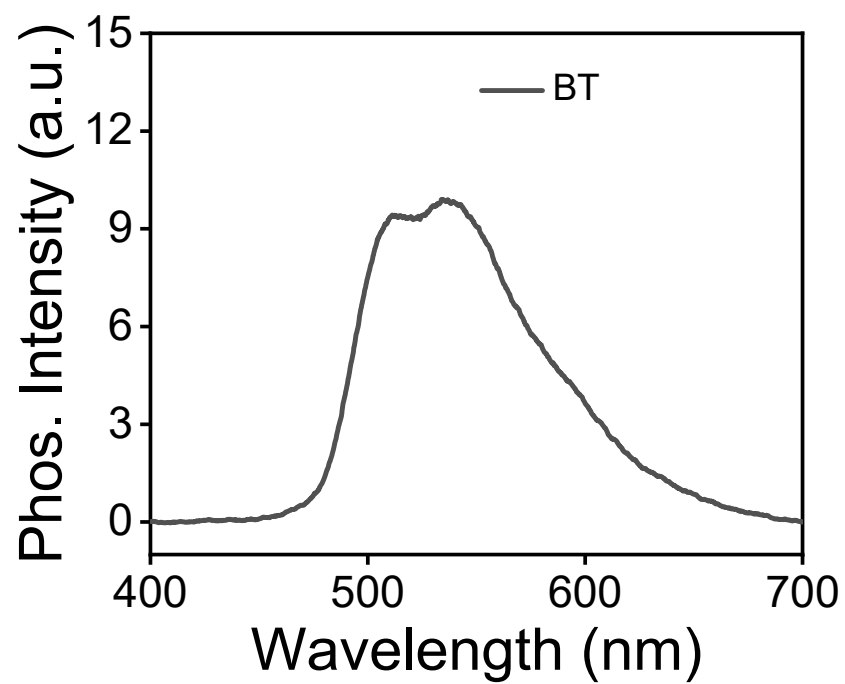

Fig.S25 Delayed emission spectra of the host (BT)

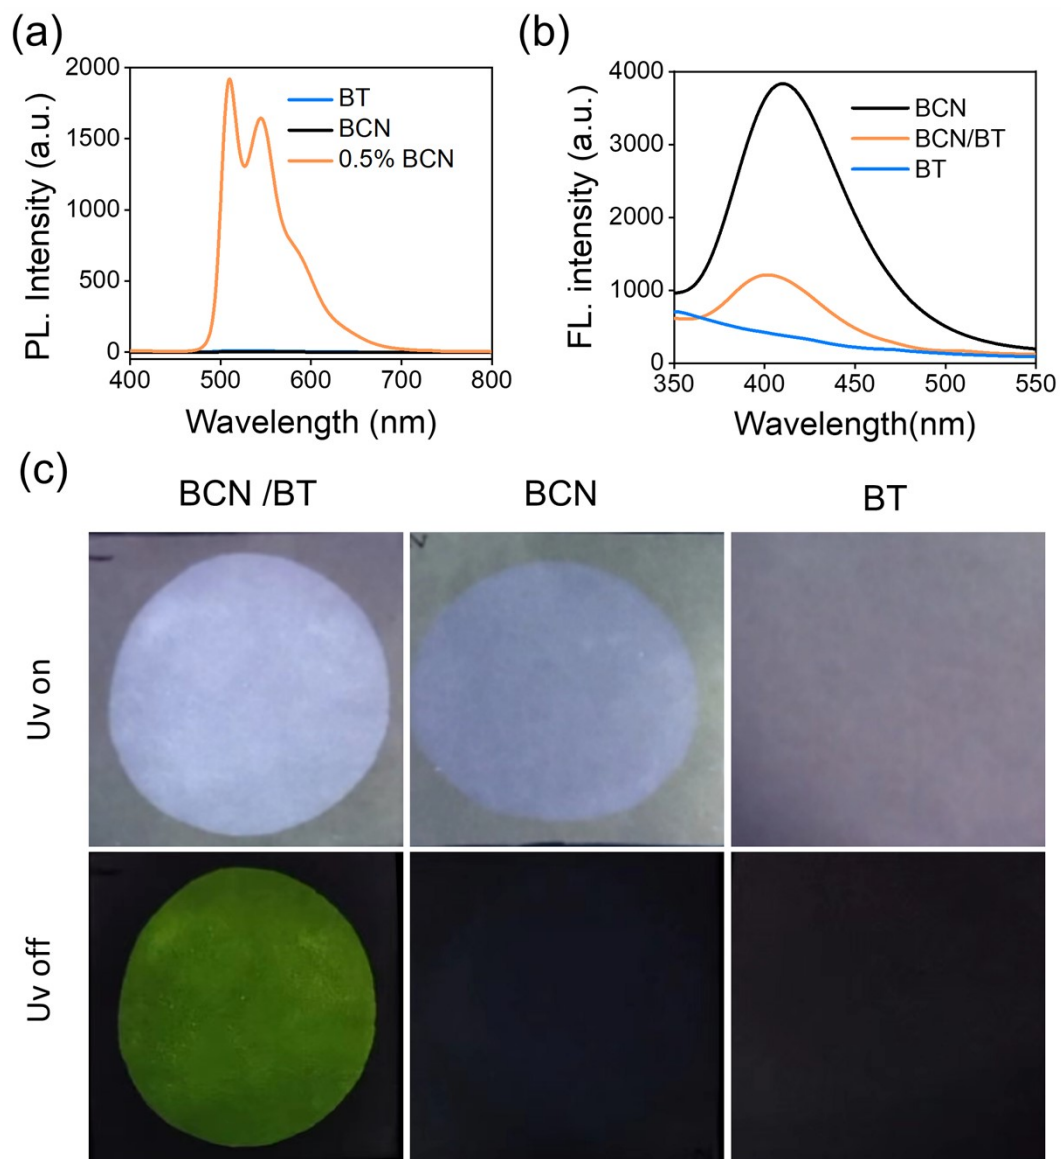

**Fig.S26** (a) Delayed emission spectra of the host (BT), guest (BCN), and Host-Guest doped materials (0.5% BCN in BT). (b) Steady state fluorescence spectral of the host (2 mM BT in filter paper), guest (0.01 mM **BCN** in filter paper), and Host-Guest doped materials (0.01 mM **BCN** and 2 mM BT in filter paper). (Delayed emission spectra: Ex. = 365 nm, Delayed time: 25 ms) (c) Luminescence photos of the Host-Guest doped materials in filter paper.

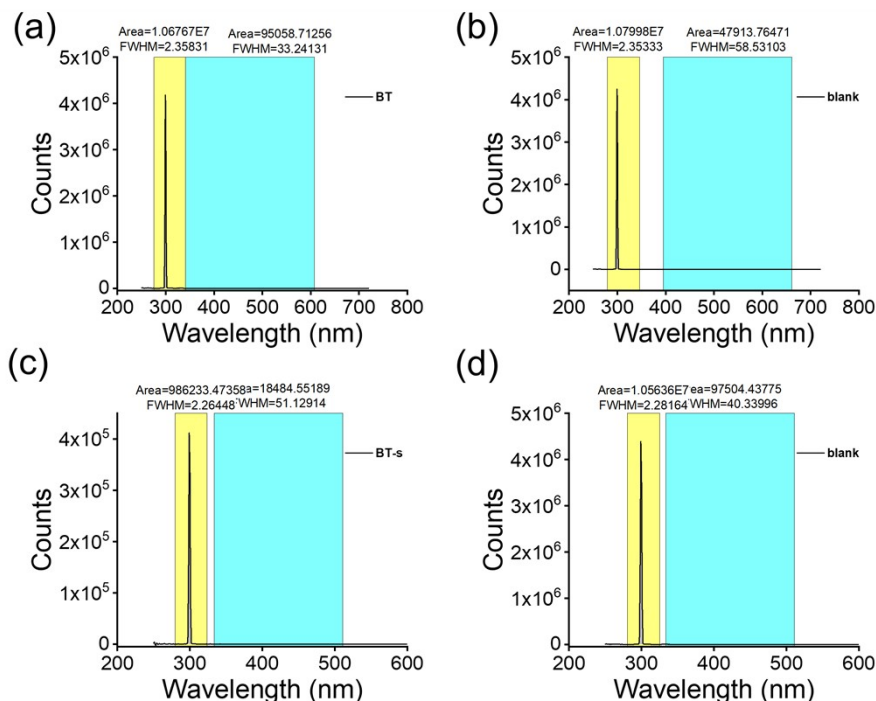

**Fig.S27** (a) Fluorescence spectra obtained using an integrating sphere of the **BT** in acetonitrile (10  $\mu$ M). (b) Fluorescence spectra obtained using an integrating sphere of the acetonitrile. (c) Fluorescence spectra obtained using an integrating sphere of the **BT** (powder). (d) Fluorescence spectra obtained using an integrating sphere of the blank.

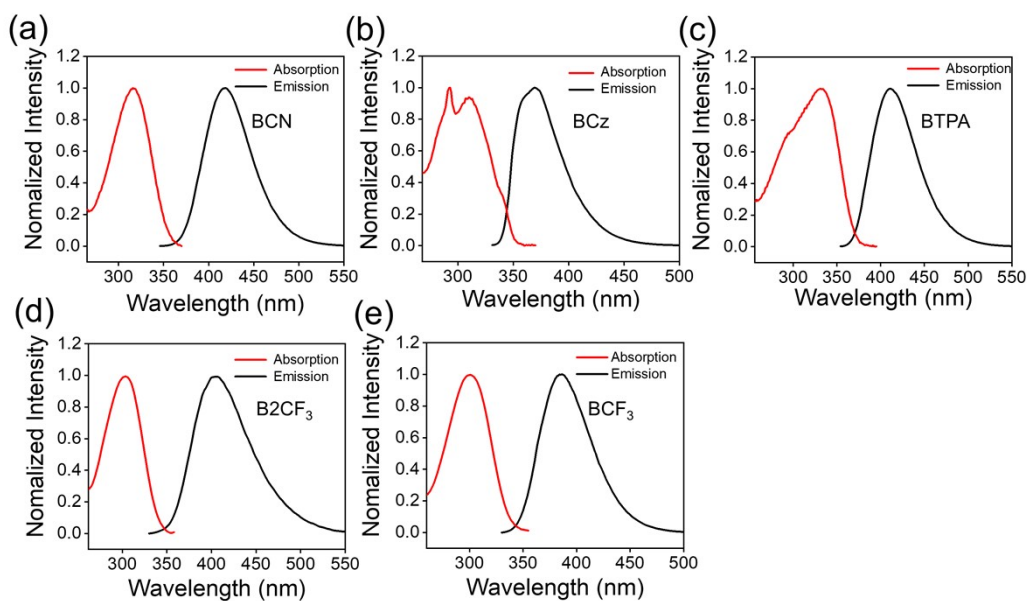

**Fig. S28** Normalized Uv-visible absorption and fluorescence spectra of guest molecules (10  $\mu$ M) in acetonitrile.

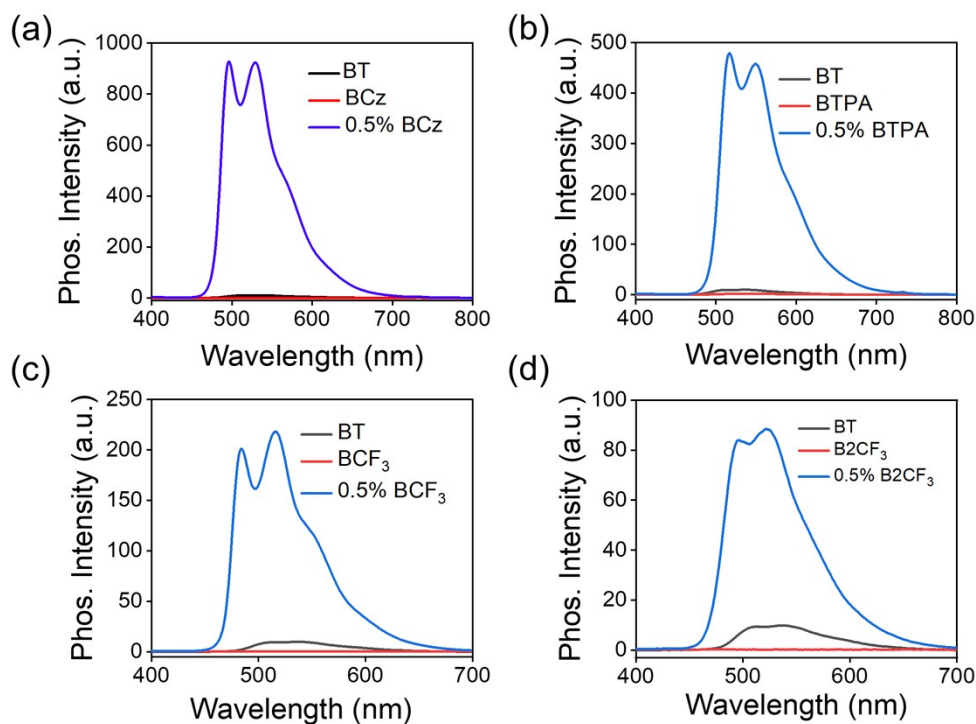

**Fig.S29** (a)Delayed emission spectra of the host (BT), guest (BCz), and Host-Guest doped materials (0.5% BCz in BT). (b)Delayed emission spectra of the host (BT), guest (BTPA), and Host-Guest doped materials (0.5% BTPA in BT). (c)Delayed emission spectra of the host (BT), guest (BCF<sub>3</sub>), and Host-Guest doped materials (0.5% BCF<sub>3</sub> in BT). (d)Delayed emission spectra of the host (BT), guest (B2CF<sub>3</sub>), and Host-Guest doped materials (0.5% B2CF<sub>3</sub> in BT).

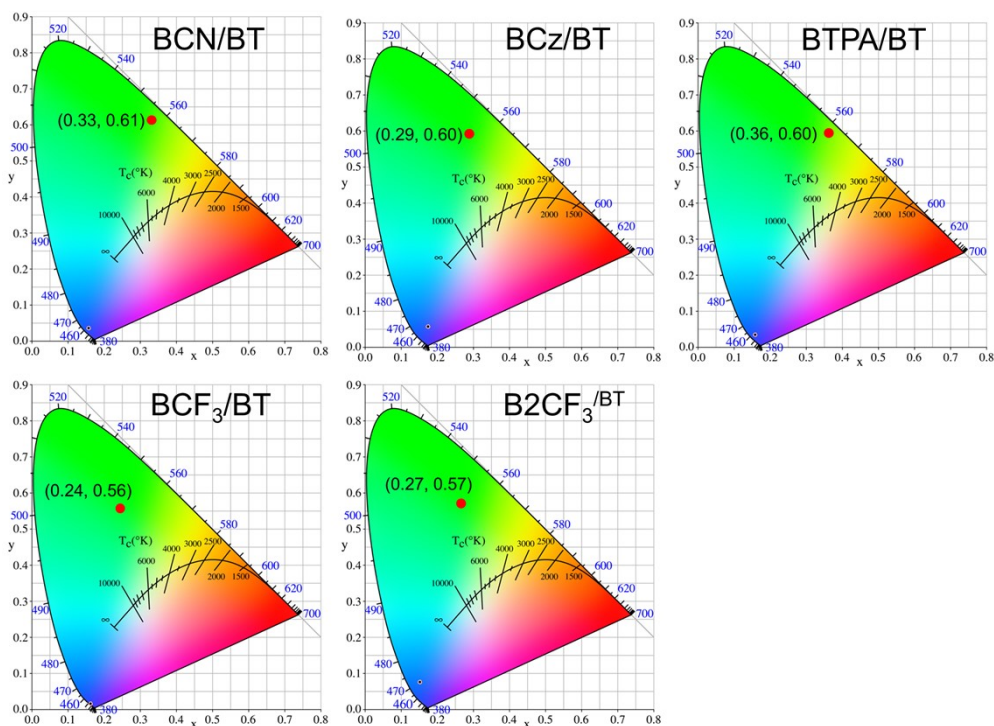

**Fig.S30** Commission Internationale de l'Eclairage (CIE) coordinates of the doping system

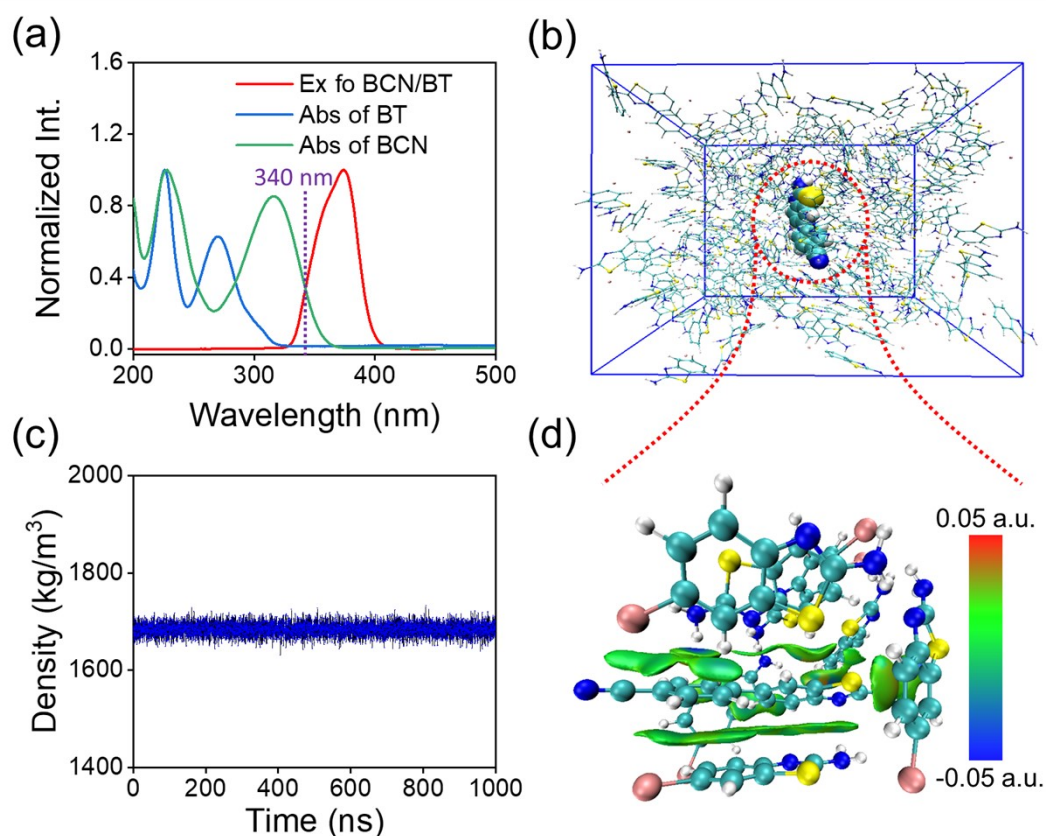

**Fig. S31.** (a) The UV-visible absorption spectra of **BCN** and **BT**, and the excitation spectra of the **BCN/BT** doped system. (b) Schematic representation of the molecular dynamics simulation of the **BCN/BT** system. (c) Density curves during the MD simulation. (d) The intermolecular interaction was visualized by IGM.

**Table S2** photophysical property parameters of pure host and guests

|                         | $\lambda_{\text{abs}}$ (nm) | $\lambda_{\text{em}}$ (nm) | Stokes shift | $\Phi_{\text{FL}}$ (%) | $\Phi_{\text{FL-S}}$ (%) |
|-------------------------|-----------------------------|----------------------------|--------------|------------------------|--------------------------|
| <b>BCN</b>              | 315                         | 416                        | 101          | ≈100                   | 3.87                     |
| <b>BCz</b>              | 310                         | 369                        | 59           | 60.96                  | 1.36                     |
| <b>BTPA</b>             | 331                         | 411                        | 80           | 75.79                  | 14.61                    |
| <b>BCF<sub>3</sub></b>  | 302                         | 405                        | 103          | 81.07                  | 13.75                    |
| <b>B2CF<sub>3</sub></b> | 301                         | 386                        | 85           | 14.66                  | NS                       |
| <b>BT</b>               | 271                         | NS                         | NS           | NS                     | NS                       |

$\Phi_{\text{FL}}$ : The absolute fluorescence quantum yield of the dilute solution in acetonitrile (10  $\mu\text{M}$ ) was determined using an integrating sphere;  $\Phi_{\text{FL-S}}$ : The absolute fluorescence quantum yield of the powder was determined using an integrating sphere. NS: no signal, indicates that no signal is detected.

**Table S3** photophysical property parameters of doped materials

|                           | $\lambda_{\text{FL}}$ (nm) | $\lambda_{\text{PL}}$ (nm) | $T_{\text{PL}}$ (ms) | $\Phi_{\text{FL}}$ (%) | $\Phi_{\text{PL}}$ (%) |
|---------------------------|----------------------------|----------------------------|----------------------|------------------------|------------------------|
| <b>BCN/BT</b>             | 415                        | 511                        | 88.68                | 18.23                  | 8.34                   |
| <b>BCz/BT</b>             | 375                        | 497                        | 28.36                | 8.17                   | 4.02                   |
| <b>BTPA/BT</b>            | 402                        | 517                        | 53.69                | 5.48                   | 0.91                   |
| <b>BCF<sub>3</sub>/BT</b> | 380                        | 516                        | 10.03                | 2.90                   | 0.66                   |

|                            |     |     |      |      |      |
|----------------------------|-----|-----|------|------|------|
| <b>B2CF<sub>3</sub>/BT</b> | 372 | 522 | 7.99 | 3.23 | 0.58 |
| <b>BT(Host)</b>            |     | 534 | 4.35 | 2.34 | 0.20 |

$\lambda_{FL}$ : Maximum fluorescence emission wavelength;  $\lambda_{PL}$ : Maximum phosphorescence emission wavelength;  $\Phi_{FL}$ : The absolute fluorescence quantum yield of the doped system were determined using an integrating sphere;  $\Phi_{PL}$ : The absolute phosphorescence quantum yield of the doped system were determined using an integrating sphere.  $T_{PL}$ : Phosphorescence emission lifetimes of the doped system.

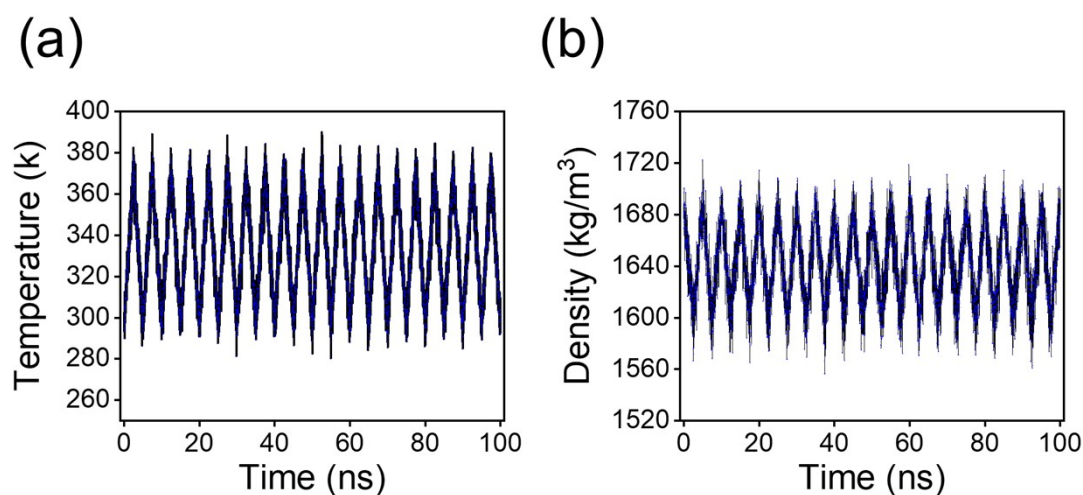

**Fig.S32** Temperature and density variation during periodic annealing simulation

**Table S4** Singlet excited state parameters and orbital contributions of **BCN/BT** molecular clusters

| Excited state  | Energy (eV) | Strength oscillator ( <i>f</i> ) | Contribution                                                                                    |
|----------------|-------------|----------------------------------|-------------------------------------------------------------------------------------------------|
| S <sub>1</sub> | 3.215       | 0.0395                           | H -> L 98.9%                                                                                    |
| S <sub>2</sub> | 3.523       | 0.0011                           | H-1 -> L 94.0%                                                                                  |
| S <sub>3</sub> | 3.675       | 0.0007                           | H-2 -> L 96.7%                                                                                  |
| S <sub>4</sub> | 3.8518      | 0.2185                           | H-4 -> L 90.1%                                                                                  |
| S <sub>5</sub> | 3.8846      | 0.0012                           | H-3 -> L 92.0%                                                                                  |
| S <sub>6</sub> | 3.9109      | 0.0097                           | H-1 -> L+1 61.4%; H-1 -> L+2 21.3%; H-2 -> L+1 6.7%                                             |
| S <sub>7</sub> | 3.9441      | 0.0033                           | H -> L+1 27.6%; H -> L+4 21.5%; H -> L+3 14.9%; H -> L+10 6.2%;<br>H -> L+5 5.8%; H -> L+2 5.6% |
| S <sub>8</sub> | 3.9777      | 0.0002                           | H -> L+1 44.0%; H -> L+2 20.3%; H -> L+4 13.6%; H -> L+3 6.3%                                   |



---

|                 |        |        |                                                                                 |
|-----------------|--------|--------|---------------------------------------------------------------------------------|
| S <sub>9</sub>  | 4.0384 | 0.0073 | H-5 -> L 45.2%; H -> L+3 22.4%; H-6 -> L 10.7%; H -> L+2 8.0%                   |
| S <sub>10</sub> | 4.0479 | 0.0031 | H -> L+2 43.8%; H-5 -> L 19.4%; H -> L+1 13.7%; H -> L+3 7.9%; H<br>-> L+4 7.4% |

---

H: HOMO, highest occupied molecular orbital; L: LUMO, lowest unoccupied molecular orbital

## Crystallography

**Table S6** Crystallographic parameters of **BT**, **BCN** and **BCz**

|                                             | <b>BT</b>                                                                     | <b>BCN</b>                                                          | <b>BCz</b>                                                            |
|---------------------------------------------|-------------------------------------------------------------------------------|---------------------------------------------------------------------|-----------------------------------------------------------------------|
| CCDC                                        | 2259073                                                                       | 2092483                                                             | 2108890                                                               |
| Empirical formula                           | C <sub>14</sub> H <sub>10</sub> Br <sub>2</sub> N <sub>4</sub> S <sub>2</sub> | C <sub>14</sub> H <sub>9</sub> N <sub>3</sub> S                     | C <sub>25</sub> H <sub>17</sub> N <sub>3</sub> S                      |
| Formula weight                              | 458.2                                                                         | 251.3                                                               | 391.47                                                                |
| Temperature (K)                             | 301(2)                                                                        | 302(2)                                                              | 301(2)                                                                |
| Wavelength (Å)                              | 0.71073                                                                       | 1.54178                                                             | 0.71073                                                               |
| Crystal system                              | Orthorhombic                                                                  | Monoclinic                                                          | Monoclinic                                                            |
| space group                                 | Pna21                                                                         | P2 <sub>1</sub> /n                                                  | P2 <sub>1</sub> /c                                                    |
| <i>a</i> (Å)                                | 17.2218(7)                                                                    | 7.51440(10)                                                         | 10.7111(3)                                                            |
| <i>b</i> (Å)                                | 4.0384(2)                                                                     | 8.8611(2)                                                           | 8.8354(3)                                                             |
| <i>c</i> (Å)                                | 22.4366(10)                                                                   | 17.9123(3)                                                          | 21.0030(7)                                                            |
| $\alpha$ (°)                                | 90                                                                            | 90                                                                  | 90                                                                    |
| $\beta$ (°)                                 | 90                                                                            | 101.2480(10)                                                        | 101.7500(10)                                                          |
| $\gamma$ (°)                                | 90                                                                            | 90                                                                  | 90                                                                    |
| V(Å <sup>3</sup> )                          | 1560.43(12)                                                                   | 1169.80(4)                                                          | 1946.01(11)                                                           |
| Z <sub>value</sub>                          | 4                                                                             | 4                                                                   | 4                                                                     |
| $\rho$ (g·cm <sup>-3</sup> )                | 1.95                                                                          | 1.427                                                               | 1.336                                                                 |
| $\mu$ (mm <sup>-1</sup> )                   | 5.462                                                                         | 2.309                                                               | 0.183                                                                 |
| F(000)                                      | 896                                                                           | 520                                                                 | 816                                                                   |
| Crystal size (mm)                           | 0.250 x 0.220 x<br>0.200                                                      | 0.240 x 0.210 x<br>0.170                                            | 0.240 x 0.200 x<br>0.160                                              |
| Limiting indices                            | -22<= <i>h</i> <=22, -<br>5<= <i>k</i> <=5, -<br>29<= <i>l</i> <=29           | -9<= <i>h</i> <=9, -<br>10<= <i>k</i> <=10, -<br>21<= <i>l</i> <=21 | -12<= <i>h</i> <=12, -<br>10<= <i>k</i> <=10, -<br>25<= <i>l</i> <=25 |
| Completeness to theta =<br>67.679           | 99.70%                                                                        | 99.10%                                                              | 99.60%                                                                |
| Goodness-of-fit on F <sup>2</sup>           | 1.133                                                                         | 1.029                                                               | 1.035                                                                 |
| R1,wR2 [ <i>I</i> >2 $\sigma$ ( <i>I</i> )] | 0.0548, 0.1542                                                                | 0.0405, 0.1078                                                      | 0.0465, 0.1147                                                        |
| R indices (all data)                        | 0.0661, 0.1608                                                                | 0.0486, 0.1186                                                      | 0.0686, 0.1320                                                        |

**Table S7** Crystallographic parameters of **BTPA**, **BCF<sub>3</sub>** and **B2CF<sub>3</sub>**

|                                    | <b>BTPA</b>                                                       | <b>BCF<sub>3</sub></b>                                            | <b>B2CF<sub>3</sub></b>                                           |
|------------------------------------|-------------------------------------------------------------------|-------------------------------------------------------------------|-------------------------------------------------------------------|
| CCDC                               | 2098590                                                           | 2098589                                                           | 2092484                                                           |
| Empirical formula                  | C <sub>25</sub> H <sub>19</sub> N <sub>3</sub> S                  | C <sub>14</sub> H <sub>9</sub> N <sub>2</sub> F <sub>3</sub> S    | C <sub>15</sub> H <sub>8</sub> F <sub>6</sub> N <sub>2</sub> S    |
| Formula weight                     | 393.49                                                            | 294.29                                                            | 362.29                                                            |
| Temperature (K)                    | 298(2)                                                            | 298(2)                                                            | 302(2)                                                            |
| Wavelength (Å)                     | 0.71073                                                           | 0.71073                                                           | 1.54178                                                           |
| Crystal system                     | Monoclinic                                                        | Monoclinic                                                        | Triclinic                                                         |
| space group                        | P2 <sub>1</sub> /c                                                | P2 <sub>1</sub> /c                                                | P-1                                                               |
| <i>a</i> (Å)                       | 17.3606(13)                                                       | 12.0962(12)                                                       | 8.5804(3)                                                         |
| <i>b</i> (Å)                       | 10.3859(7)                                                        | 9.1516(9)                                                         | 9.4893(4)                                                         |
| <i>c</i> (Å)                       | 11.4467(7)                                                        | 11.7094(10)                                                       | 10.4129(4)                                                        |
| <i>α</i> (°)                       | 90                                                                | 90                                                                | 102.4300(10)                                                      |
| <i>β</i> (°)                       | 97.743(3)                                                         | 97.352(5)                                                         | 109.290(2)                                                        |
| <i>γ</i> (°)                       | 90                                                                | 90                                                                | 107.080(2)                                                        |
| <i>V</i> (Å <sup>3</sup> )         | 2045.1(2)                                                         | 1285.6(2))                                                        | 717.67(5)                                                         |
| <i>Z</i> <sub>value</sub>          | 4                                                                 | 4                                                                 | 2                                                                 |
| <i>ρ</i> (g·cm <sup>-3</sup> )     | 1.278                                                             | 1.521                                                             | 1.677                                                             |
| <i>μ</i> (mm <sup>-1</sup> )       | 0.174                                                             | 0.278                                                             | 2.691                                                             |
| F(000)                             | 824                                                               | 600                                                               | 364                                                               |
| Crystal size (mm)                  | 0.300 x 0.200 x 0.100                                             | 0.240 x 0.140 x 0.120                                             | 0.320 x 0.200 x 0.160                                             |
| Limiting indices                   | -20<= <i>h</i> <=20, -<br>12<= <i>k</i> <=12, -13<= <i>l</i> <=13 | -14<= <i>h</i> <=14, -<br>10<= <i>k</i> <=10, -14<= <i>l</i> <=13 | -10<= <i>h</i> <=10, -<br>11<= <i>k</i> <=11, -12<= <i>l</i> <=12 |
| Completeness to theta<br>= 67.679  | 99.90%                                                            | 96.6%                                                             | 99.10%                                                            |
| Goodness-of-fit on F <sup>2</sup>  | 1.178                                                             | 1.194                                                             | 1.095                                                             |
| R1,wR2 [ <i>I</i> >2σ( <i>I</i> )] | 0.1001, 0.1225                                                    | 0.0825, 0.1523                                                    | 0.0806, 0.2296                                                    |
| R indices (all data)               | 0.1601, 0.1824                                                    | 0.1973, 0.2110                                                    | 0.0882, 0.2403                                                    |

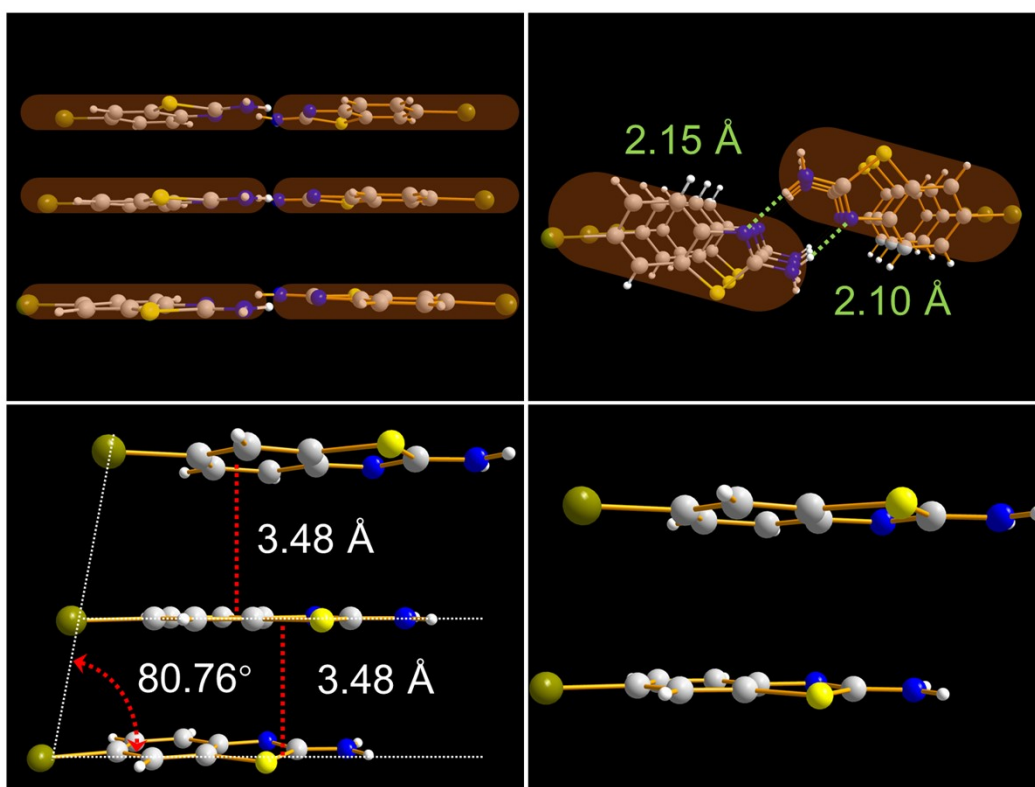

Fig. S33 The bulk form of the host (BT) molecule

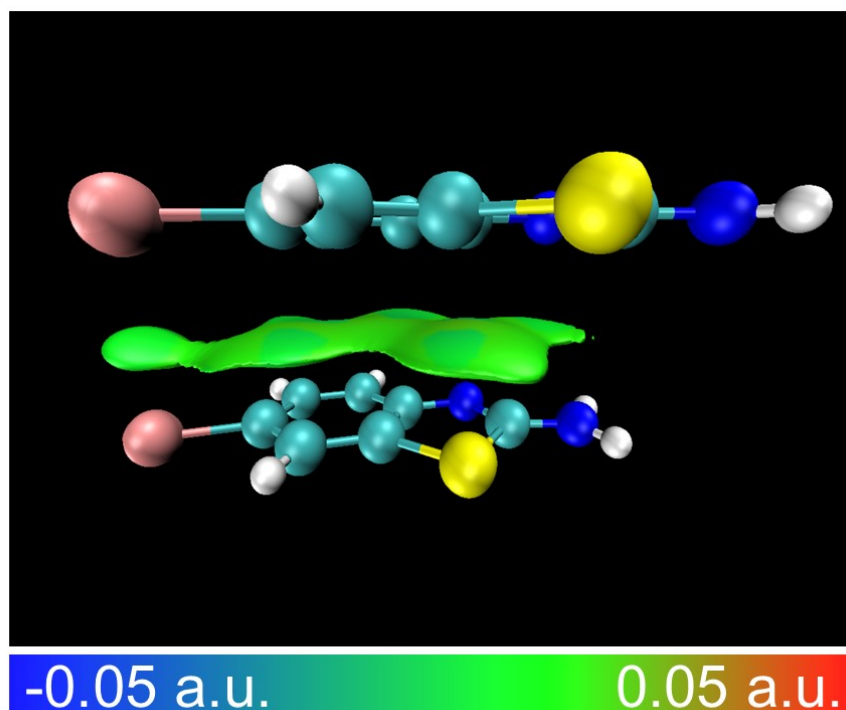

Fig. S34 The intermolecular interaction of BT was visualized by IGM.

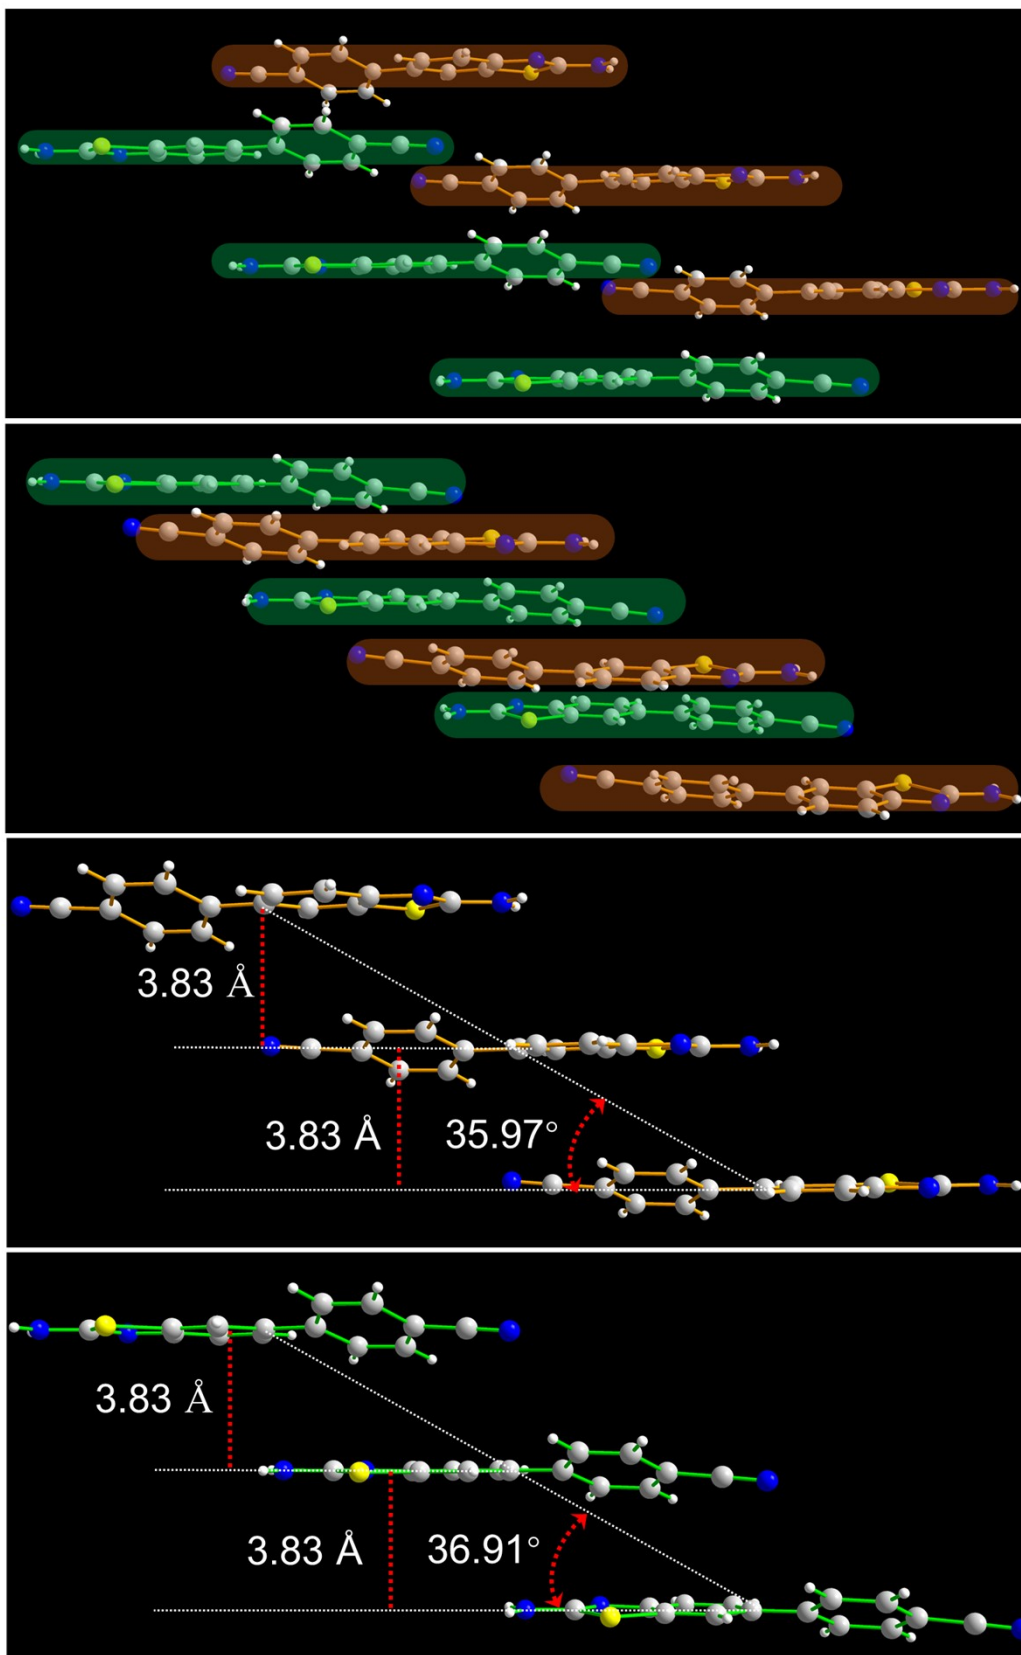

Fig. S35 The bulk form of the BCN

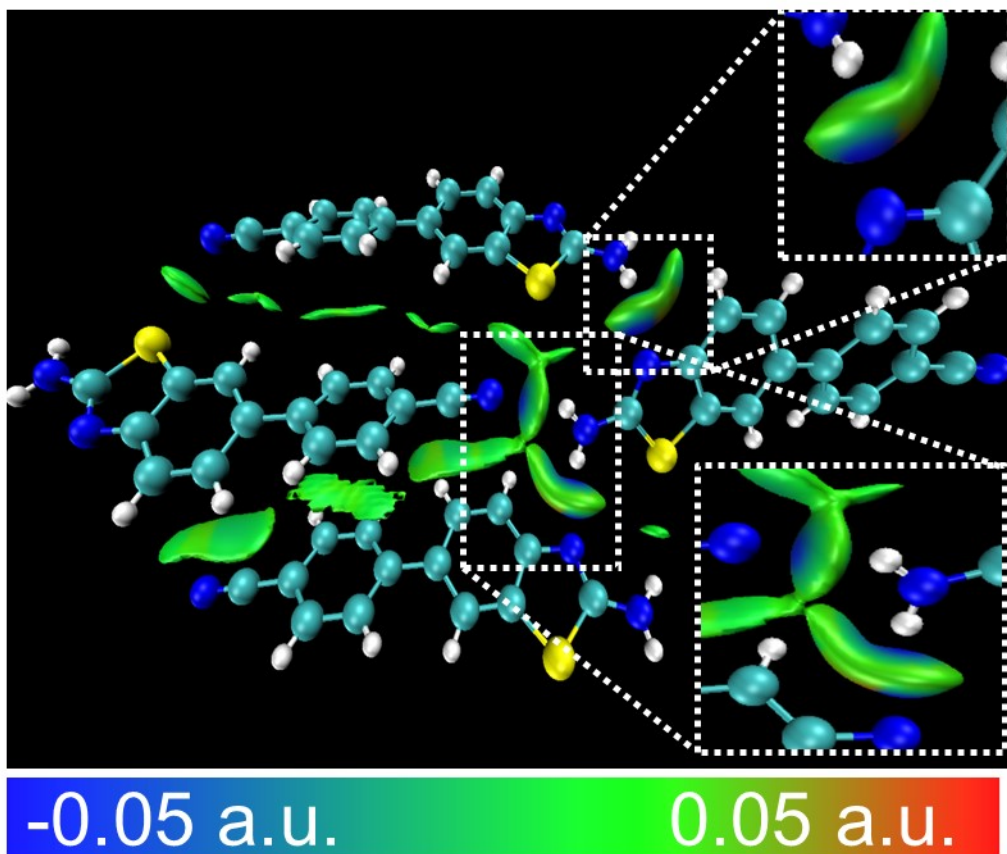

**Fig. S36** The intermolecular interaction of **BCN** was visualized by IGM.

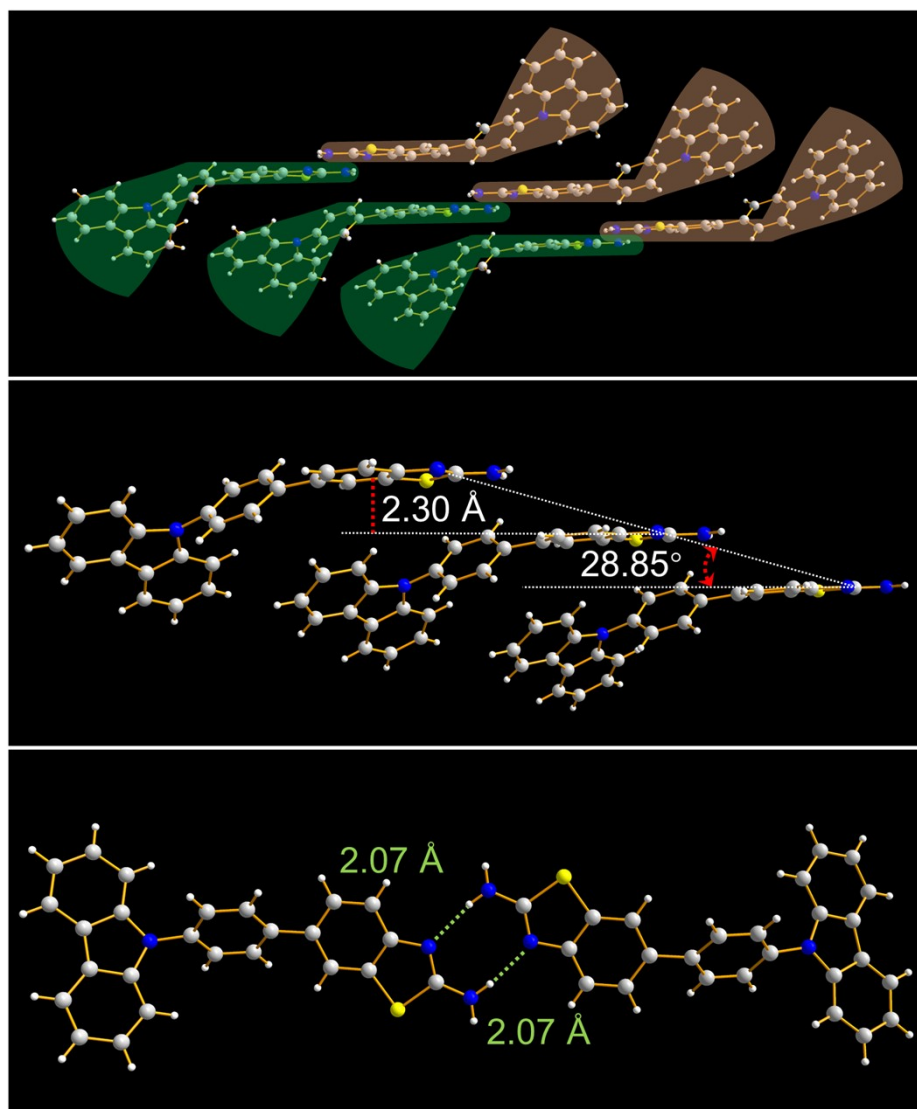

Fig. S37 The bulk form of the BCz

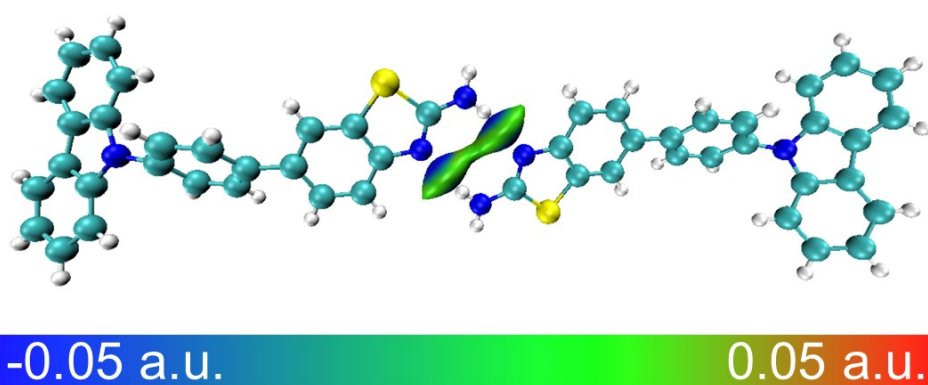

Fig. S38 The intermolecular interaction of BCz was visualized by IGM.

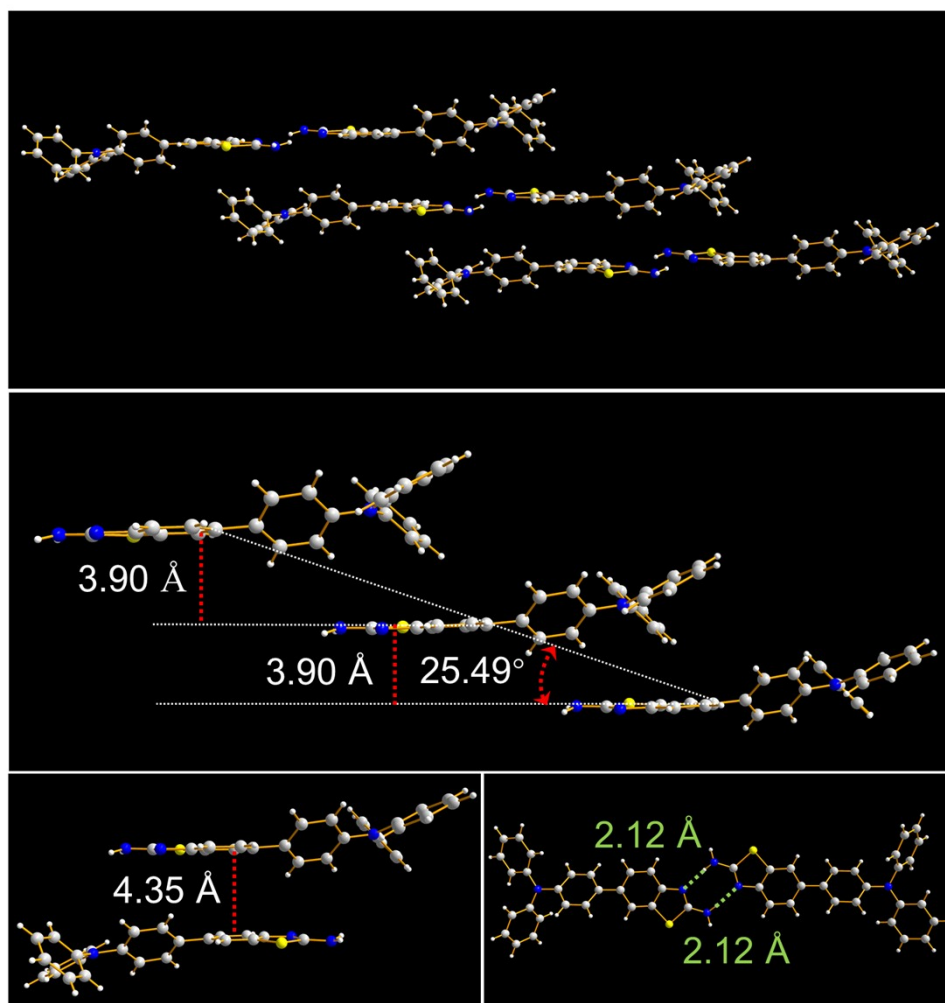

Fig. S39 The bulk form of the BTPA

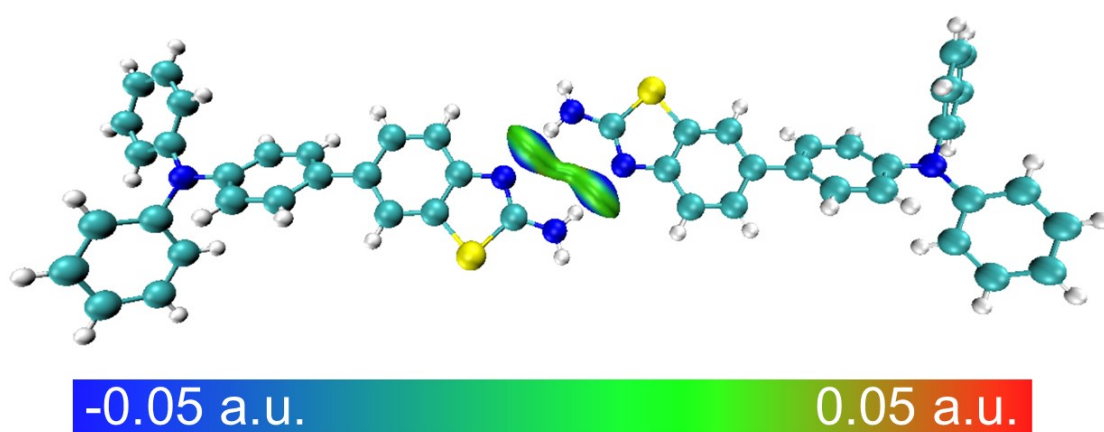

Fig. S40 The intermolecular interaction of BTPA was visualized by IGM.



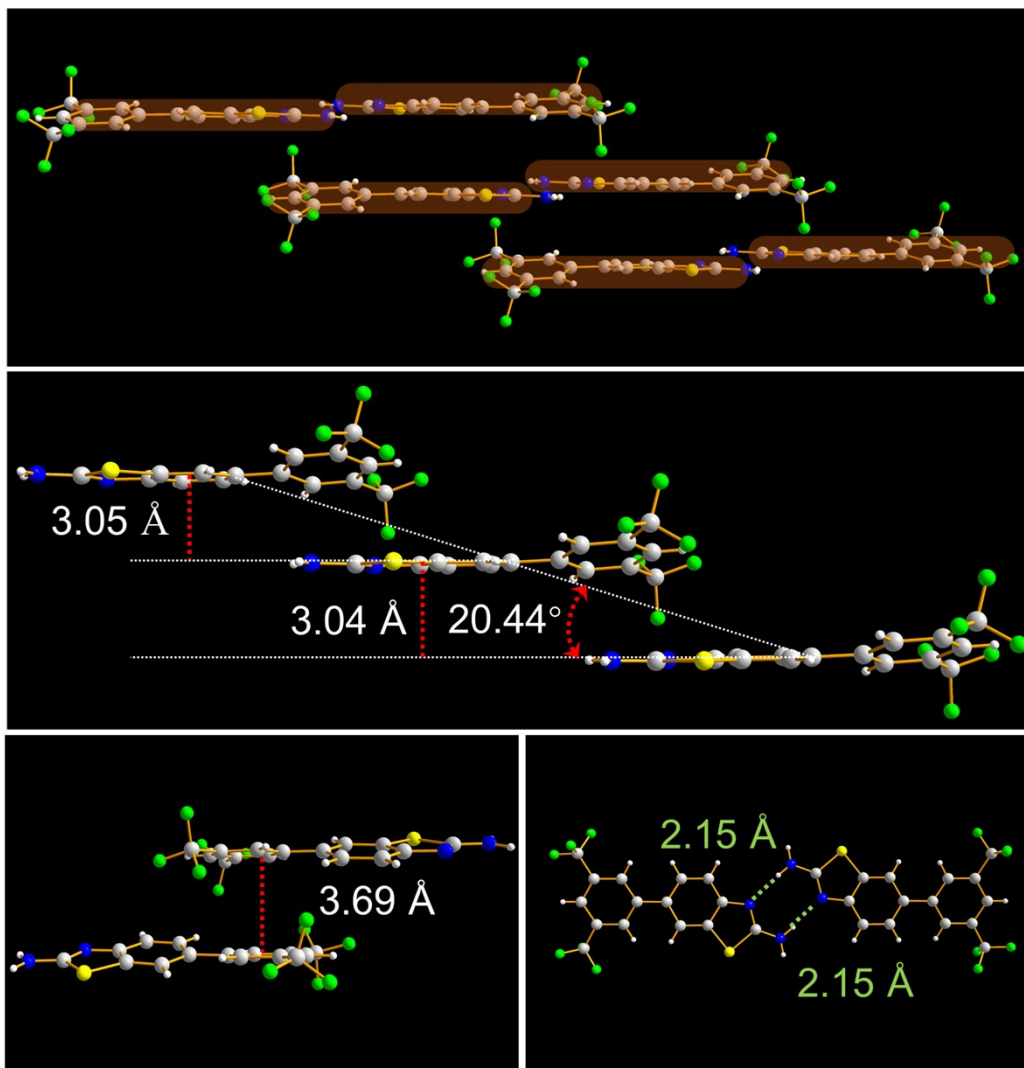

Fig. S41 The bulk form of the  $\text{B}_2\text{CF}_3$

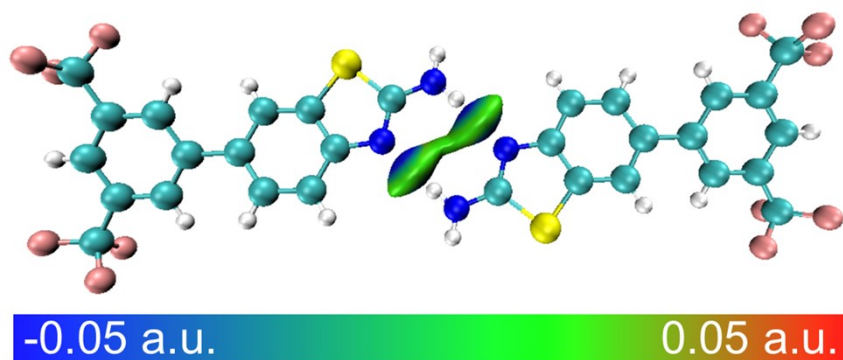

Fig. S42 The intermolecular interaction of  $\text{B}_2\text{CF}_3$  was visualized by IGM.

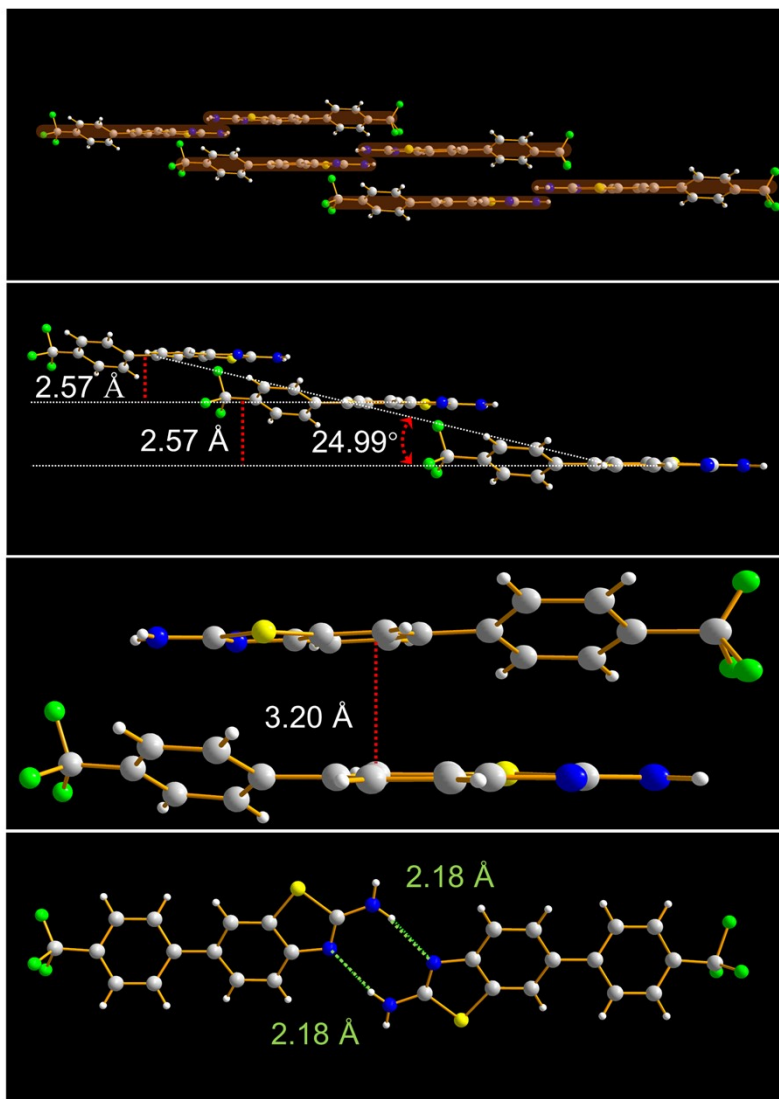

Fig. S43 The bulk form of the BCF<sub>3</sub>

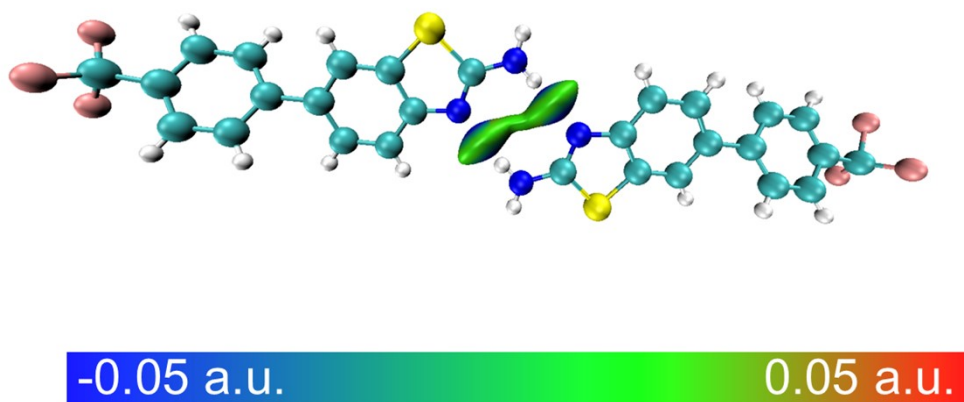

Fig. S44 The intermolecular interaction of BCF<sub>3</sub> was visualized by IGM.

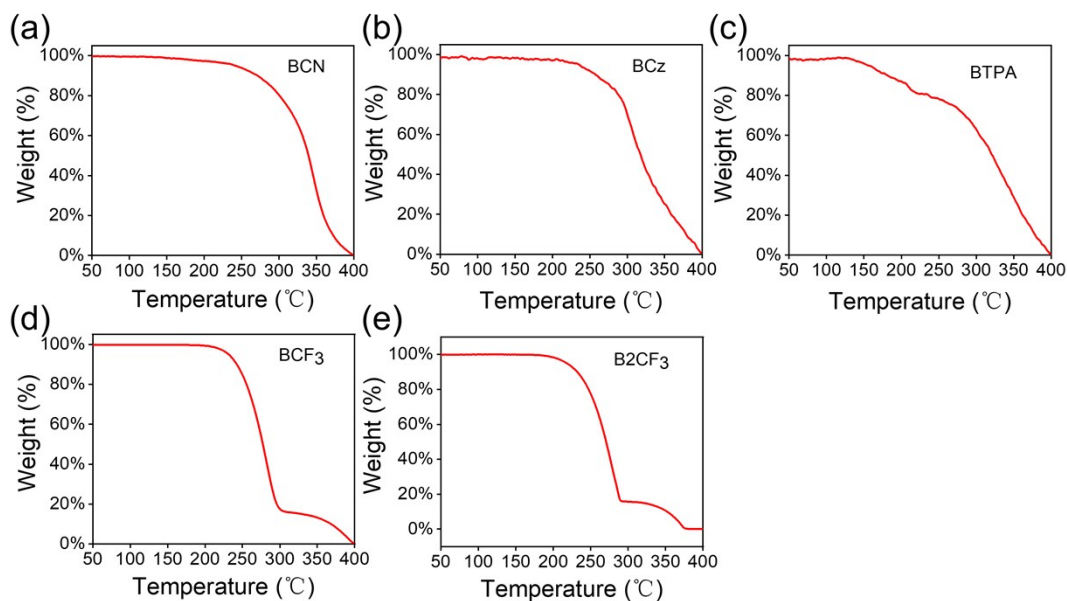

Fig.S45 TG curves of guest molecules.

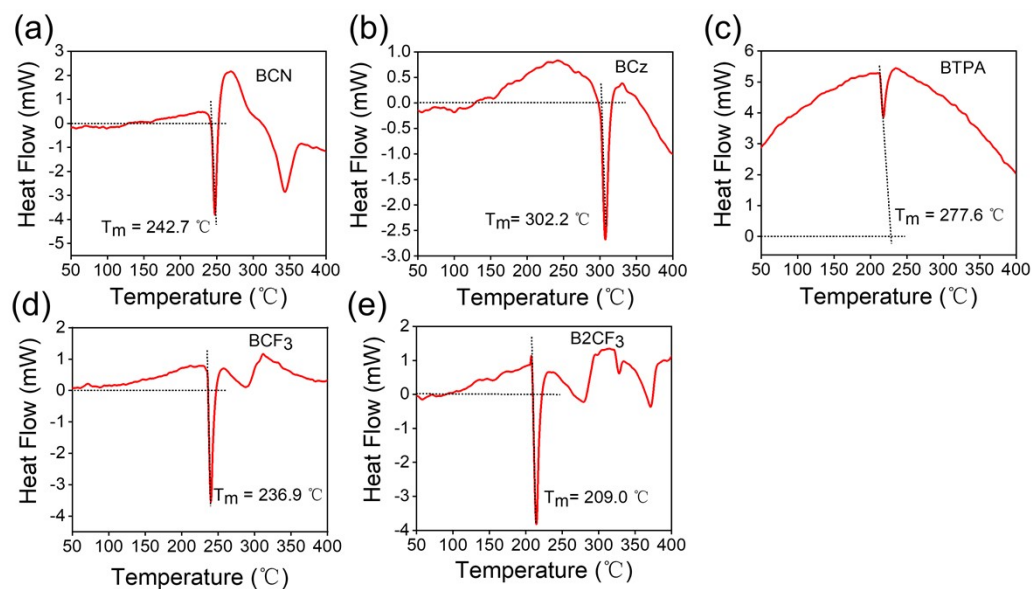

Fig.S46 DGS curves of guest molecules.

## Cartesian coordinate

BT

|   |             |             |             |
|---|-------------|-------------|-------------|
| C | -1.27526157 | 0.95510561  | 0.00000232  |
| C | -0.88623503 | -0.40876425 | -0.00000274 |
| C | 0.44757554  | -0.80033826 | -0.00000939 |
| C | 1.40322455  | 0.21565923  | -0.00000405 |
| C | 1.06397772  | 1.57042783  | 0.00000145  |
| C | -0.28246163 | 1.94383196  | 0.00000155  |
| N | -2.65198981 | 1.20181283  | 0.00000106  |

|    |             |             |             |
|----|-------------|-------------|-------------|
| C  | -3.36430743 | 0.10562525  | -0.00000093 |
| S  | -2.36406804 | -1.47961552 | 0.00000561  |
| N  | -4.70533625 | 0.03121204  | -0.00000454 |
| Br | 3.28933138  | -0.28446693 | 0.00000050  |
| H  | 0.73735603  | -1.84315152 | -0.00000939 |
| H  | 1.83751940  | 2.32827373  | 0.00000432  |
| H  | -0.56844307 | 2.98903544  | 0.00000499  |
| H  | -5.19770593 | -0.84918438 | -0.00000427 |
| H  | -5.24802669 | 0.88475927  | -0.00000796 |

**BCN**

|   |             |             |             |
|---|-------------|-------------|-------------|
| C | 0.30608990  | 1.75195759  | 0.27925859  |
| C | -0.21795199 | 0.45493944  | 0.07578274  |
| C | 0.67563355  | -0.62380748 | -0.09436423 |
| C | 2.03925233  | -0.37791192 | -0.05764432 |
| C | 2.56963688  | 0.92133767  | 0.14455877  |
| C | 1.67878403  | 1.98924982  | 0.31509096  |
| S | 3.40085102  | -1.57861206 | -0.26129738 |
| C | 4.55434022  | -0.12598116 | -0.03333856 |
| N | 3.96380428  | 1.02540447  | 0.15441044  |
| N | 5.88459600  | -0.33160232 | -0.07196560 |
| C | -1.67957449 | 0.22547659  | 0.04205408  |
| C | -2.23569788 | -0.97829796 | 0.52329351  |
| C | -3.60859660 | -1.20116925 | 0.49026328  |
| C | -4.47018005 | -0.21248925 | -0.02580247 |
| C | -3.92920720 | 0.99648679  | -0.50738548 |
| C | -2.55402096 | 1.20512986  | -0.47344391 |
| C | -5.87978271 | -0.43393890 | -0.05992645 |
| N | -7.04043289 | -0.61662348 | -0.08800535 |
| H | -0.37446228 | 2.58026912  | 0.43816801  |
| H | 0.29846865  | -1.62223811 | -0.27803261 |
| H | 2.06990622  | 2.98586416  | 0.48106035  |
| H | 6.28305605  | -1.24413385 | -0.21843606 |
| H | 6.50753256  | 0.45235882  | 0.05294670  |
| H | -1.58915909 | -1.73574005 | 0.95003718  |
| H | -4.02004039 | -2.12879580 | 0.87020669  |
| H | -4.58644179 | 1.75654803  | -0.91289665 |
| H | -2.15059790 | 2.12751888  | -0.87375097 |

**BCz**

|   |            |             |             |
|---|------------|-------------|-------------|
| C | 5.14887263 | 0.94894608  | -0.04713531 |
| C | 5.29285466 | -0.48349401 | 0.11463136  |
| C | 3.75541489 | 1.21736807  | -0.11210984 |
| C | 6.06266828 | 2.00421337  | -0.15195809 |

|   |             |             |             |
|---|-------------|-------------|-------------|
| C | 3.98119679  | -1.02849105 | 0.13719581  |
| C | 6.39752968  | -1.33235969 | 0.25163001  |
| N | 3.05669272  | 0.01134604  | -0.00034217 |
| C | 3.75942656  | -2.39715157 | 0.31123585  |
| C | 6.18243035  | -2.69869532 | 0.41405500  |
| H | 7.40494071  | -0.92711049 | 0.23539054  |
| C | 1.64567780  | -0.13423864 | -0.02859186 |
| H | 2.75590742  | -2.80565783 | 0.34173524  |
| C | 4.87622138  | -3.22008477 | 0.44656325  |
| H | 7.02909537  | -3.36973199 | 0.52024726  |
| C | 1.04783894  | -1.01651400 | -0.93465034 |
| C | 0.84450337  | 0.60356498  | 0.84925092  |
| C | 3.26699331  | 2.51363651  | -0.29594867 |
| H | 4.73089070  | -4.28766104 | 0.58172724  |
| C | -0.33559198 | -1.16104295 | -0.95471960 |
| H | 1.66651341  | -1.57104455 | -1.63177453 |
| H | 1.30816818  | 1.26933809  | 1.56893620  |
| C | -0.53906391 | 0.46335390  | 0.81243240  |
| H | 2.20313929  | 2.71117902  | -0.35868929 |
| C | 4.19786878  | 3.54597835  | -0.39859584 |
| C | -1.15853423 | -0.42259110 | -0.08641380 |
| H | -0.78438275 | -1.83114941 | -1.68016637 |
| H | -1.14319804 | 1.02519919  | 1.51713129  |
| H | 3.84378184  | 4.56268535  | -0.54013353 |
| C | 5.58086192  | 3.29947501  | -0.32437824 |
| C | -2.63205596 | -0.57199860 | -0.12083767 |
| H | 6.27728955  | 4.12818560  | -0.40594305 |
| C | -3.46307708 | 0.52888264  | 0.14989571  |
| C | -3.22545902 | -1.81535870 | -0.42528531 |
| H | 7.13019728  | 1.81081250  | -0.10321433 |
| C | -4.84007896 | 0.35762619  | 0.11164179  |
| H | -3.03171362 | 1.50075211  | 0.36234857  |
| H | -2.58866962 | -2.67379331 | -0.61114014 |
| C | -4.60563918 | -1.98019966 | -0.46666378 |
| S | -6.10410830 | 1.55613883  | 0.39637466  |
| C | -5.44004245 | -0.88831673 | -0.19794982 |
| H | -5.04502447 | -2.94574945 | -0.69547222 |
| C | -7.31322821 | 0.26717108  | 0.07173451  |
| N | -6.82573562 | -0.90780650 | -0.21269456 |
| N | -8.63108324 | 0.54646381  | 0.19083190  |
| H | -9.26975186 | -0.14800243 | -0.17651622 |
| H | -8.94609785 | 1.50542761  | 0.13880213  |

**BTPA**

|   |             |             |             |
|---|-------------|-------------|-------------|
| C | -5.33416006 | -0.34319165 | 0.81287360  |
| C | -4.73400464 | 0.13491114  | -0.37806287 |
| C | -3.35638030 | 0.20442542  | -0.53873095 |
| C | -2.52422965 | -0.21099634 | 0.51558193  |
| C | -3.11981970 | -0.68541735 | 1.70396460  |
| C | -4.50012075 | -0.75494183 | 1.85924025  |
| N | -6.72078893 | -0.35491115 | 0.83154991  |
| C | -7.20681606 | 0.08419499  | -0.29356475 |
| S | -5.99867873 | 0.57259849  | -1.52993748 |
| N | -8.52869469 | 0.12660147  | -0.59980044 |
| C | -1.05097772 | -0.15140545 | 0.37769322  |
| C | -0.42620342 | 0.86652174  | -0.36409090 |
| C | 0.95584340  | 0.91898891  | -0.50506878 |
| C | 1.77225627  | -0.04056824 | 0.11346316  |
| C | 1.16171336  | -1.05675161 | 0.86485398  |
| C | -0.22238858 | -1.11234471 | 0.98350738  |
| N | 3.18049440  | 0.01727475  | -0.01622748 |
| C | 3.92982260  | -1.17663209 | -0.17420217 |
| C | 3.84605224  | 1.26968027  | 0.01947167  |
| C | 3.45416818  | 2.25621159  | 0.93739250  |
| C | 4.10462593  | 3.48858321  | 0.96165687  |
| C | 5.16400538  | 3.75017701  | 0.08897434  |
| C | 5.56135845  | 2.76447854  | -0.81816628 |
| C | 4.90428421  | 1.53611984  | -0.86286761 |
| C | 5.14867468  | -1.34430300 | 0.50081991  |
| C | 5.88727687  | -2.51430815 | 0.33322880  |
| C | 5.41674791  | -3.53979151 | -0.49096351 |
| C | 4.19841132  | -3.37722683 | -1.15567118 |
| C | 3.46221732  | -2.20302650 | -1.00934234 |
| H | -2.92513439 | 0.55026188  | -1.47230531 |
| H | -2.48268998 | -0.98428073 | 2.53037035  |
| H | -4.93972883 | -1.11587371 | 2.78419733  |
| H | -8.84119994 | 0.76256908  | -1.32342706 |
| H | -9.16033536 | 0.04239783  | 0.18987005  |
| H | -1.02920912 | 1.63809105  | -0.83354647 |
| H | 1.40898627  | 1.71360524  | -1.08854188 |
| H | 1.77528613  | -1.80930829 | 1.34884627  |
| H | -0.66704621 | -1.92359560 | 1.55200953  |
| H | 2.64161530  | 2.05274946  | 1.62710976  |
| H | 3.78899682  | 4.24235339  | 1.67792296  |
| H | 5.67362177  | 4.70889931  | 0.11598936  |
| H | 6.37918744  | 2.95545499  | -1.50774989 |
| H | 5.20669885  | 0.77937973  | -1.57930590 |

|   |            |             |             |
|---|------------|-------------|-------------|
| H | 5.51098761 | -0.55681448 | 1.15353142  |
| H | 6.82925063 | -2.62884464 | 0.86278480  |
| H | 5.99130841 | -4.45327464 | -0.61347409 |
| H | 3.82267825 | -4.16272645 | -1.80584074 |
| H | 2.52436749 | -2.07569918 | -1.54003982 |

**BCF<sub>3</sub>**

|   |             |             |             |
|---|-------------|-------------|-------------|
| C | -3.43200703 | 0.90386427  | -0.16368026 |
| C | -2.87985136 | -0.37686499 | 0.06688687  |
| C | -1.50984950 | -0.59458072 | 0.11387434  |
| C | -0.64084695 | 0.49140141  | -0.07391419 |
| C | -1.18869865 | 1.76986466  | -0.30321185 |
| C | -2.56057773 | 1.98229709  | -0.35070851 |
| N | -4.81478255 | 0.97160577  | -0.17578921 |
| C | -5.34107255 | -0.19768301 | 0.03526443  |
| S | -4.18670873 | -1.54036187 | 0.27806752  |
| N | -6.67420651 | -0.45297241 | 0.02278539  |
| C | 0.82891441  | 0.29280495  | -0.03493511 |
| C | 1.41664156  | -0.86986196 | -0.55973623 |
| C | 2.79281319  | -1.06007167 | -0.52353816 |
| C | 3.61533962  | -0.08385338 | 0.04158083  |
| C | 3.05223450  | 1.08140415  | 0.56545177  |
| C | 1.67484643  | 1.26210807  | 0.52890006  |
| C | 5.10385266  | -0.25874431 | 0.03198717  |
| F | 5.47760329  | -1.56009885 | 0.07773214  |
| F | 5.70912178  | 0.35979590  | 1.07446122  |
| F | 5.67772686  | 0.25665609  | -1.09386698 |
| H | -1.11693420 | -1.58338207 | 0.31509683  |
| H | -0.52432141 | 2.60904242  | -0.47102420 |
| H | -2.96251784 | 2.97083840  | -0.53889718 |
| H | -7.02119952 | -1.29643833 | 0.45268968  |
| H | -7.28637283 | 0.34921873  | 0.07346387  |
| H | 0.79484645  | -1.62746472 | -1.02092360 |
| H | 3.22205111  | -1.96353802 | -0.93831272 |
| H | 3.68255966  | 1.83869972  | 1.01464320  |
| H | 1.25165297  | 2.15869454  | 0.96494633  |

**B2CF<sub>3</sub>**

|   |            |             |             |
|---|------------|-------------|-------------|
| C | 0.45098220 | -0.22690575 | 0.11855666  |
| C | 0.97361931 | 1.07441576  | 0.17639961  |
| C | 2.34474839 | 1.29617856  | 0.06110917  |
| C | 3.23200278 | 0.23307606  | -0.10397461 |
| C | 2.71772129 | -1.06090838 | -0.15747839 |
| C | 1.34684184 | -1.29313286 | -0.05098418 |

|   |             |             |             |
|---|-------------|-------------|-------------|
| C | -1.00651655 | -0.46739687 | 0.22609301  |
| C | -1.49826841 | -1.62315428 | 0.86744121  |
| C | -2.86128495 | -1.87079158 | 0.98500413  |
| C | -3.77742510 | -0.95398846 | 0.45459386  |
| C | -3.27722112 | 0.20600443  | -0.18876724 |
| C | -1.91770511 | 0.45821865  | -0.31002322 |
| N | -5.15607924 | -1.07859671 | 0.49386840  |
| C | -5.73362099 | -0.06638505 | -0.09055612 |
| S | -4.63058634 | 1.17752291  | -0.76965122 |
| N | -7.07281028 | 0.12493968  | -0.15327300 |
| C | 2.88026683  | 2.69404252  | 0.18714120  |
| F | 2.01803778  | 3.61594909  | -0.29779826 |
| F | 4.05008674  | 2.85336426  | -0.47153354 |
| F | 3.11491810  | 3.02789198  | 1.48073817  |
| C | 3.65042561  | -2.23091955 | -0.29262653 |
| F | 4.83246914  | -1.88329781 | -0.84773618 |
| F | 3.12273529  | -3.21520203 | -1.05594026 |
| F | 3.93403434  | -2.78838748 | 0.91104763  |
| H | 0.30700458  | 1.91621194  | 0.32601535  |
| H | 4.29660282  | 0.40928430  | -0.19550209 |
| H | 0.97040457  | -2.30716535 | -0.12520094 |
| H | -0.79654114 | -2.32738518 | 1.30261082  |
| H | -3.22465772 | -2.76048961 | 1.48986994  |
| H | -1.56171769 | 1.34174534  | -0.82957208 |
| H | -7.45193440 | 0.74498987  | -0.85838889 |
| H | -7.64548161 | -0.68493988 | 0.05985005  |

**BCN/BT molecular clusters.**

|   |             |             |             |
|---|-------------|-------------|-------------|
| C | 0.20420882  | 2.04370153  | 1.10371371  |
| C | 0.43130149  | 0.67177076  | 1.35720657  |
| C | 1.45896985  | -0.03219901 | 0.74744485  |
| C | 2.30626386  | 0.64558394  | -0.14020626 |
| C | 2.07018389  | 2.01093377  | -0.40328626 |
| C | 1.03608421  | 2.70790848  | 0.20211848  |
| N | -0.84971007 | 2.61263294  | 1.80683492  |
| C | -1.43443658 | 1.72492193  | 2.56076609  |
| S | -0.74905016 | 0.08327253  | 2.51716993  |
| N | -2.47733297 | 2.01174973  | 3.40205484  |
| C | 3.44948595  | -0.05025736 | -0.75830998 |
| C | 4.00965517  | 0.40379962  | -1.96475176 |
| C | 5.11254406  | -0.22446477 | -2.53195280 |
| C | 5.67391149  | -1.34883574 | -1.91091737 |
| C | 5.12458502  | -1.81881448 | -0.70911327 |
| C | 4.03707873  | -1.17133862 | -0.14472387 |



|   |             |             |             |
|---|-------------|-------------|-------------|
| C | 6.78915873  | -2.02481689 | -2.49642928 |
| N | 7.68051077  | -2.59408185 | -2.98221587 |
| H | 1.57828506  | -1.09243148 | 0.93428418  |
| H | 2.75177563  | 2.55266593  | -1.04417464 |
| H | 0.89328599  | 3.76595994  | 0.02878783  |
| H | -2.91472332 | 2.90393246  | 3.19299522  |
| H | -3.15142063 | 1.26483078  | 3.53602146  |
| H | 3.57176178  | 1.25456067  | -2.47104167 |
| H | 5.53628746  | 0.14272616  | -3.46176083 |
| H | 5.56969617  | -2.67645222 | -0.22136315 |
| H | 3.66866351  | -1.50999285 | 0.81583234  |
| C | -2.00777664 | -2.50321766 | 4.20457495  |
| C | -2.42714226 | -1.33457457 | 4.88427167  |
| C | -1.56402006 | -0.59973852 | 5.69321312  |
| C | -0.25810495 | -1.07056369 | 5.80941166  |
| C | 0.17616922  | -2.24501716 | 5.18963167  |
| C | -0.70272633 | -2.96973569 | 4.38898338  |
| N | -2.92607615 | -3.03794046 | 3.31683757  |
| C | -4.02328769 | -2.33518126 | 3.27979640  |
| S | -4.08374694 | -0.94836646 | 4.41458870  |
| N | -5.09816909 | -2.62300780 | 2.51122527  |
| H | -1.86991119 | 0.32150530  | 6.17279578  |
| H | 1.20018307  | -2.57516251 | 5.31933469  |
| H | -0.37386678 | -3.87656649 | 3.89201703  |
| H | -5.70580082 | -1.86999090 | 2.19365623  |
| H | -4.91479267 | -3.30507448 | 1.78014235  |
| C | -3.51173920 | -0.47628561 | -3.34186343 |
| C | -4.16283561 | 0.76055243  | -3.08146873 |
| C | -5.53980940 | 0.84950338  | -2.90467817 |
| C | -6.26474540 | -0.33966803 | -2.95982996 |
| C | -5.65970562 | -1.57512794 | -3.20873730 |
| C | -4.28367259 | -1.64270800 | -3.41189623 |
| N | -2.14058527 | -0.42354216 | -3.46767623 |
| C | -1.68451723 | 0.77614001  | -3.24989833 |
| S | -2.95396543 | 2.02783655  | -2.93047180 |
| N | -0.38847845 | 1.12030851  | -3.17609928 |
| H | -6.03373842 | 1.78717795  | -2.68375580 |
| H | -6.26300679 | -2.47606905 | -3.23432616 |
| H | -3.79200892 | -2.59153142 | -3.59349942 |
| H | -0.12427203 | 2.09539495  | -3.07722002 |
| H | 0.27801915  | 0.37658190  | -2.98022958 |
| C | 4.27398976  | 2.10434386  | 2.12760061  |
| C | 4.61154813  | 0.87186358  | 2.74454271  |
| C | 5.71036434  | 0.12267581  | 2.33496976  |

|    |             |             |             |
|----|-------------|-------------|-------------|
| C  | 6.46609682  | 0.61711499  | 1.27303102  |
| C  | 6.14976207  | 1.82122011  | 0.63287228  |
| C  | 5.06163618  | 2.56925565  | 1.06887879  |
| N  | 3.15201525  | 2.74046715  | 2.62476345  |
| C  | 2.60346952  | 2.04581608  | 3.57362572  |
| S  | 3.43457976  | 0.50534874  | 4.00665025  |
| N  | 1.48791685  | 2.42493357  | 4.25402388  |
| Br | 7.94534149  | -0.41337448 | 0.63250218  |
| H  | 5.97483512  | -0.81593212 | 2.80570479  |
| H  | 6.74350825  | 2.16910434  | -0.20552921 |
| H  | 4.80998681  | 3.50781829  | 0.58440982  |
| H  | 1.02844589  | 1.75047644  | 4.84751563  |
| H  | 0.89303733  | 3.08799615  | 3.77189856  |
| C  | -0.44370872 | -2.14024422 | -1.72190252 |
| C  | -0.81207400 | -3.38949989 | -2.28135959 |
| C  | -1.98949225 | -4.03974766 | -1.92317802 |
| C  | -2.78574843 | -3.40833536 | -0.97499847 |
| C  | -2.43926563 | -2.19767563 | -0.37557402 |
| C  | -1.27246466 | -1.55220707 | -0.76329672 |
| N  | 0.75698764  | -1.61860419 | -2.17420802 |
| C  | 1.32457362  | -2.43291176 | -3.02364158 |
| S  | 0.40364691  | -3.89762778 | -3.43825453 |
| N  | 2.52818747  | -2.20590282 | -3.61952628 |
| H  | -2.27477486 | -4.99254882 | -2.35248128 |
| H  | -3.07003502 | -1.76897058 | 0.39014154  |
| H  | -1.00606617 | -0.59350191 | -0.34105764 |
| H  | 3.11277399  | -3.02100056 | -3.77888232 |
| H  | 3.04322151  | -1.44077325 | -3.19395816 |
| C  | -5.85528980 | 2.58860659  | 0.22694978  |
| C  | -4.45635347 | 2.44790425  | 0.40706851  |
| C  | -3.60183987 | 3.54625814  | 0.47265218  |
| C  | -4.18980875 | 4.80185439  | 0.35926871  |
| C  | -5.56324142 | 4.98597068  | 0.17039197  |
| C  | -6.39872366 | 3.87394580  | 0.10466366  |
| N  | -6.57177732 | 1.40351025  | 0.16068971  |
| C  | -5.78313801 | 0.38305191  | 0.26091809  |
| S  | -4.04818851 | 0.74061751  | 0.49438535  |
| N  | -6.22335718 | -0.92774646 | 0.25929054  |
| Br | -3.04600362 | 6.34463016  | 0.46554095  |
| H  | -2.53589752 | 3.43627821  | 0.62523022  |
| H  | -5.96845906 | 5.98824204  | 0.07848871  |
| H  | -7.46943493 | 3.98694730  | -0.03786079 |
| H  | -7.16097962 | -0.97534019 | -0.14549598 |
| H  | -5.61086510 | -1.58279080 | -0.22108244 |

|    |             |             |             |
|----|-------------|-------------|-------------|
| C  | 0.64066372  | -6.08169458 | -0.53553461 |
| C  | 1.31717191  | -4.91101174 | -0.10774673 |
| C  | 2.52760052  | -4.51089086 | -0.66261337 |
| C  | 3.07422674  | -5.32558369 | -1.65183617 |
| C  | 2.45811521  | -6.50802390 | -2.07033349 |
| C  | 1.23916474  | -6.88693693 | -1.51311336 |
| N  | -0.58956634 | -6.31790861 | 0.04947878  |
| C  | -0.88118074 | -5.38764925 | 0.91461584  |
| S  | 0.35777351  | -4.10015362 | 1.12419389  |
| N  | -2.00747593 | -5.36042752 | 1.65948578  |
| Br | 4.69961563  | -4.77392728 | -2.51483477 |
| H  | 3.01259252  | -3.58835625 | -0.37166442 |
| H  | 2.92269724  | -7.11380427 | -2.84050915 |
| H  | 0.73543688  | -7.79225289 | -1.83833398 |
| H  | -2.74123934 | -5.98047932 | 1.33999874  |
| H  | -2.30928293 | -4.51160418 | 2.14235859  |
| C  | 1.51499082  | 4.29667797  | -2.99437713 |
| C  | 1.88688156  | 5.25354058  | -2.01721154 |
| C  | 3.20940810  | 5.42429911  | -1.62030546 |
| C  | 4.17448954  | 4.63764370  | -2.25203460 |
| C  | 3.84407461  | 3.72746296  | -3.26293202 |
| C  | 2.51315995  | 3.55001355  | -3.63120001 |
| N  | 0.15362194  | 4.17613320  | -3.22756096 |
| C  | -0.52056058 | 5.04108582  | -2.51939092 |
| S  | 0.44488012  | 6.07806326  | -1.42455372 |
| N  | -1.85506879 | 5.24082149  | -2.61596508 |
| H  | 3.48883647  | 6.12617896  | -0.84610812 |
| H  | 4.63080714  | 3.16037415  | -3.74563543 |
| H  | 2.23712796  | 2.83799363  | -4.39642480 |
| H  | -2.33284262 | 5.66642877  | -1.83241884 |
| H  | -2.36764939 | 4.52522305  | -3.11779894 |
| Br | 1.01323055  | -0.01407287 | 6.77489672  |
| Br | -4.48652824 | -4.19582127 | -0.54729104 |
| Br | -8.14250743 | -0.29257414 | -2.58700191 |
| Br | 5.99433636  | 4.79216362  | -1.70791480 |

## References

- [1] Frisch, M. J.; Trucks, G. W.; Schlegel, H. B.; Scuseria, G. E.; Robb, M. A.; Cheeseman, J. R.; Scalmani, G.; Barone, V.; Mennucci, B.; Petersson, G. A.; Nakatsuji, H.; Caricato, M.; Li, X.; Hratchian, H. P.; Izmaylov, A. F.; Bloino, J.; Zheng, G.; Sonnenberg, J. L.; Hada, M.; Ehara, M.; Toyota, K.; Fukuda, R.; Hasegawa, J.; Ishida, M.; Nakajima, T.; Honda, Y.; Kitao, O.; Nakai, H.; Vreven, T.; Mont-gomery, J. A., Jr.; Peralta, J. E.; Ogliaro, F.; Bearpark, M.; Heyd, J. J.; Brothers, E.; Kudin, K. N.; Staroverov, V. N.; Kobayashi, R.; Nor-mand, J.; Raghavachari, K.; Rendell, A.; Burant, J. C.; Iyengar, S. S.; Tomasi, J.; Cossi, M.; Rega, N.; Millam, J. M.; Klene, M.; Knox, J. E.; Cross, J. B.; Bakken, V.; Adamo, C.; Jaramillo, J.; Gomperts, R.; Stratmann, R. E.; Yazyev, O.; Austin, A. J.; Cammi, R.; Pomelli, C.; Ochterski, J. W.; Martin, R. L.; Morokuma, K.; Zakrzewski, V. G.; Voth, G. A.; Salvador, P.; Dannenberg, J. J.; Dapprich, S.; Daniels, A. D.; Farkas, Ö.; Foresman, J. B.; Ortiz, J. V.; Cioslowski, J.; Fox, D. J. Gaussian, Inc. Gaussian 09, Revision E.01, Wallingford CT, **2013**.
- [2] Stephens, P. J.; Devlin, F. J.; Chabalowski, C. F.; Frisch, M. J. Ab Initio Calculation of Vibrational Absorption and Circular Dichroism Spectra Using Density Functional Force Fields. *J. Phys. Chem.* **1994**, *98*, 11623-11627.
- [3] Grimme, S.; Antony, J.; Ehrlich, S.; Krieg, H. A Consistent and Accurate Ab Initio Parametrization of Density Functional Dispersion Correction (DFT-D) for the 94 Elements H-Pu. *J. Chem. Phys.* **2010**, *132*, 154104.
- [4] (a) Petersson, G. A.; Al-Laham, M. A. A Complete Basis Set Model Chemistry. II. Open-Shell Systems and the Total Energies of the First-Row Atoms. *J. Chem. Phys.* **1991**, *94*, 6081-6090. (b) Petersson, G. A.; Bennett, A.; Tensfeldt, T. G.; Al-Laham, M. A.; Shirley, W. A.; Mantzaris, J. A Complete Basis Set Model Chemistry. I. The Total Energies of Closed-Shell Atoms and Hydrides of the First-Row Atoms. *J. Chem. Phys.* **1988**, *89*, 2193-2218.
- [5] Adamo, C.; Barone, V. Toward Reliable Density Functional Methods without Adjustable Parameters: The PBE0 Model. *J. Chem. Phys.* **1999**, *110*, 6158.
- [6] Weigend, F.; Ahlrichs, R. Balanced basis sets of split valence, triple zeta valence and quadruple zeta valence quality for H to Rn: Design and assessment of accuracy. *Phys. Chem. Chem. Phys.* **2005**, *7*, 3297-3305.
- [7] Marenich, A. V.; Cramer, C. J.; Truhlar, D. G. Universal solvation model based on solute electron density and on a continuum model of the solvent defined by the bulk dielectric constant and atomic surface tensions. *J. Phys. Chem. B.* **2009**, *113*, 6378-6396.
- [8] Lu, T.; Chen, F. W. Multiwfn: A multifunctional wavefunction analyzer. *J. Comput. Chem.* **2012**, *33*, 580-592.
- [9] Humphrey, W.; Dalke, A.; Schulten, K. VMD: Visual molecular dynamics. *J. Mol. Graphics* **1996**, *14*, 33-38.
- [10] Abraham, M. J.; Murtola, T.; Schulz, R.; Páll, S.; Smith, J. C.; Hess, B.; Lindahl, E. GROMACS: High performance molecular simulations through multi-level parallelism from laptops to supercomputers. *SoftwareX* **2015**, *1*, 19-25.
- [11] Wang, J.; Wolf, R. M.; Caldwell, J. W.; Kollman, P. A.; Case, D. A. Development and testing of a general AMBER force field. *J. Comput. Chem.* **2004**, *25*, 1157-1174.
- [12] Tian Lu, Sobtop, Version 1.0 (dev3.1), <http://sobereva.com/soft/Sobtop>. (accessed on 03/02/2023)
- [13] Bussi, G.; Donadio, D.; Parrinello, M. Canonical sampling through velocity rescaling. *J. Chem. Phys.* **2007**, *126*, 014101.
- [14] Lemak, A. S.; Balabaev, N. K. On The Berendsen Thermostat. *Molecular Simulation*, **1994**, *13*, 177-187.
- [15] Berendsen, H. J. C.; Postma, J. P. M.; van Gunsteren, W. F.; DiNola, A.; Haak, J. R. Molecular dynamics with coupling to an external bath. *J. Chem. Phys.* **1984**, *81*, 3684-3690.
